# Supplementary material for: Imaging Internal Defects with Synthetic and Experimental Data
Source: Hindawi journal article supplement (doi:10.1155/2019/6956809), 2019-07-14
Supplement: f1 [file 6956809.f1.zip]

Archive with 3 entries (2 files):
- 6956809.f1/
- 6956809.f1/data of fig7.CSV
- 6956809.f1/data of fig9b.CSV
