# Supplementary material for: Imaging Internal Defects with Synthetic and Experimental Data
Source: Hindawi journal article supplement (doi:10.1155/2019/6956809), 2019-07-14
Supplement: f1 [file 6956809.f1.zip › 6956809.f1/data of fig7.CSV]

Scan	Dist.(cm)	Scan Data Values Scan Values
0	0.00	0	0	0	0	0	0	0	0	0	0	0	0	0	0	0	0	0	0	0	0	-1127082	-1125909	-1126813	-1128351	-1129159	-1127780	-1123896	-1117255	-1107934	-1095126	-1078419	-1055229	-1023432	-980617	-924393	-850384	-754215	-630195	-472523	-272973	-28278	270928	635268	1070414	1580316	2161230	2799589	3484139
1	0.13	0	0	0	0	0	0	0	0	0	0	0	0	0	0	0	0	0	0	0	0	-1135078	-1133511	-1133226	-1132878	-1131770	-1129585	-1126040	-1120325	-1112506	-1101568	-1086087	-1063546	-1031761	-987439	-927922	-850438	-750318	-624049	-465171	-270235	-31183	255957	603930	1020221	1511844	2083293	2726211	3422869
2	0.25	0	0	0	0	0	0	0	0	0	0	0	0	0	0	0	0	0	0	0	0	-1149356	-1148707	-1149213	-1149451	-1148390	-1145968	-1142217	-1136819	-1129538	-1119360	-1104433	-1082351	-1050598	-1006608	-946980	-868546	-766385	-636681	-474811	-275855	-38369	250243	600036	1024305	1525869	2107243	2757758	3459751
3	0.38	0	0	0	0	0	0	0	0	0	0	0	0	0	0	0	0	0	0	0	0	-1130313	-1129506	-1130614	-1131643	-1131485	-1129364	-1124647	-1117682	-1108770	-1097531	-1082129	-1060507	-1030178	-988468	-932132	-858796	-763631	-641762	-488852	-295388	-57950	233701	590713	1015378	1512730	2081916	2722523	3424499
4	0.50	0	0	0	0	0	0	0	0	0	0	0	0	0	0	0	0	0	0	0	0	-1132719	-1136788	-1142185	-1145953	-1146697	-1143895	-1138924	-1131548	-1121639	-1109229	-1092561	-1070131	-1038979	-997174	-940933	-865539	-768823	-644516	-487427	-291652	-51001	245304	606257	1035402	1542869	2124955	2778099	3487784
5	0.63	0	0	0	0	0	0	0	0	0	0	0	0	0	0	0	0	0	0	0	0	-1145050	-1145747	-1147615	-1148327	-1146712	-1142549	-1136629	-1129158	-1120483	-1109925	-1095331	-1073946	-1042968	-999723	-941044	-864130	-766052	-641952	-487158	-296258	-60562	228177	579838	1000973	1501840	2081520	2735439	3451551
6	0.75	0	0	0	0	0	0	0	0	0	0	0	0	0	0	0	0	0	0	0	0	-1131451	-1130201	-1129901	-1129204	-1127733	-1124964	-1121547	-1117322	-1111199	-1101944	-1087008	-1064352	-1031506	-986952	-927985	-851851	-755118	-632833	-479616	-288839	-53113	237340	591776	1016729	1513322	2083359	2723644	3423229
7	0.88	0	0	0	0	0	0	0	0	0	0	0	0	0	0	0	0	0	0	0	0	-1144631	-1145548	-1147827	-1149124	-1148095	-1144108	-1138144	-1130106	-1120898	-1109997	-1095758	-1075095	-1045128	-1002584	-944803	-868084	-769389	-643449	-485771	-290437	-53018	235520	582030	994784	1481330	2044738	2683442	3387061
8	1.00	0	0	0	0	0	0	0	0	0	0	0	0	0	0	0	0	0	0	0	0	-1142859	-1141988	-1142416	-1143048	-1142874	-1140912	-1137432	-1131404	-1122828	-1110535	-1093194	-1069256	-1036506	-993186	-936719	-862658	-766051	-642215	-484299	-288285	-48113	243289	594908	1018548	1518923	2101665	2763594	3490218
9	1.13	0	0	0	0	0	0	0	0	0	0	0	0	0	0	0	0	0	0	0	0	-1135074	-1137353	-1140865	-1143460	-1143491	-1140564	-1135565	-1128097	-1119063	-1107181	-1091565	-1069430	-1037819	-993882	-934614	-855475	-753963	-626536	-468035	-275312	-40582	245614	597804	1029291	1544237	2142658	2810537	3526576
10	1.25	0	0	0	0	0	0	0	0	0	0	0	0	0	0	0	0	0	0	0	0	-1148570	-1147668	-1148333	-1148966	-1148301	-1145706	-1140912	-1134188	-1125281	-1113019	-1096422	-1073354	-1041853	-999293	-943364	-871280	-777569	-657372	-504361	-308046	-63824	238748	608515	1048071	1562685	2146867	2799414	3506308
11	1.38	0	0	0	0	0	0	0	0	0	0	0	0	0	0	0	0	0	0	0	0	-1140596	-1136910	-1134774	-1133476	-1132369	-1130565	-1127939	-1123271	-1115060	-1102893	-1085252	-1061172	-1029465	-989009	-935943	-864999	-771921	-650980	-497241	-305183	-70485	219018	572473	995749	1498639	2080922	2731428	3441092
12	1.50	0	0	0	0	0	0	0	0	0	0	0	0	0	0	0	0	0	0	0	0	-1125460	-1127746	-1131655	-1135139	-1136920	-1136447	-1133909	-1129259	-1121346	-1109824	-1093352	-1070543	-1039727	-998476	-942896	-868795	-770515	-643877	-482529	-284297	-41960	249492	599126	1015357	1504365	2062950	2695951	3391341
13	1.63	0	0	0	0	0	0	0	0	0	0	0	0	0	0	0	0	0	0	0	0	-1126832	-1131687	-1138291	-1143997	-1147103	-1147402	-1144959	-1139048	-1130095	-1117437	-1100303	-1076943	-1045338	-1003220	-946474	-872389	-775827	-652767	-498780	-306932	-72288	216217	570280	997057	1503924	2091638	2749135	3461201
14	1.75	0	0	0	0	0	0	0	0	0	0	0	0	0	0	0	0	0	0	0	0	-1138228	-1136211	-1135344	-1134949	-1133830	-1131419	-1127494	-1121709	-1113449	-1101548	-1085439	-1063087	-1032176	-990295	-934290	-859795	-762838	-639290	-485161	-293691	-61837	221041	566734	984620	1479318	2054643	2696818	3398339
15	1.88	0	0	0	0	0	0	0	0	0	0	0	0	0	0	0	0	0	0	0	0	-1151611	-1151516	-1152872	-1154432	-1155126	-1153912	-1150728	-1145432	-1137676	-1126643	-1110612	-1087835	-1055017	-1010282	-951266	-874580	-776047	-650087	-491719	-294668	-53672	237702	588786	1004954	1499164	2074079	2726168	3443831
16	2.00	0	0	0	0	0	0	0	0	0	0	0	0	0	0	0	0	0	0	0	0	-1140924	-1142390	-1145290	-1147481	-1147607	-1145321	-1141223	-1135154	-1127194	-1116728	-1101627	-1080205	-1049058	-1005900	-946364	-866793	-763327	-632906	-472598	-276226	-38004	250880	601885	1022135	1515384	2087398	2734444	3446447
17	2.13	0	0	0	0	0	0	0	0	0	0	0	0	0	0	0	0	0	0	0	0	-1138741	-1140739	-1144546	-1147975	-1149375	-1148321	-1144294	-1137152	-1127147	-1114358	-1097117	-1074874	-1044607	-1003644	-948099	-873581	-775484	-650455	-493351	-299216	-63033	225643	578282	1000199	1495973	2066028	2705236	3404142
18	2.25	0	0	0	0	0	0	0	0	0	0	0	0	0	0	0	0	0	0	0	0	-1138882	-1140047	-1143193	-1146119	-1147912	-1147220	-1145301	-1141163	-1135091	-1125621	-1110535	-1087663	-1055414	-1011447	-954359	-879669	-783145	-659595	-503025	-309315	-73431	214285	565068	983414	1479157	2052232	2697827	3404457
19	2.38	0	0	0	0	0	0	0	0	0	0	0	0	0	0	0	0	0	0	0	0	-1134729	-1135170	-1137451	-1139417	-1140078	-1138584	-1135264	-1129601	-1121704	-1110032	-1093357	-1069100	-1035499	-990682	-932792	-857803	-762443	-640151	-486209	-293726	-58282	223079	565807	974794	1462104	2031766	2680790	3395239
20	2.50	0	0	0	0	0	0	0	0	0	0	0	0	0	0	0	0	0	0	0	0	-1137561	-1139008	-1141840	-1144372	-1145395	-1144152	-1140157	-1133015	-1122790	-1109859	-1092901	-1071082	-1041005	-999035	-942907	-867148	-768657	-642967	-487357	-296400	-64307	216645	561481	980473	1475995	2048284	2688246	3381018
21	2.63	0	0	0	0	0	0	0	0	0	0	0	0	0	0	0	0	0	0	0	0	-1134604	-1133943	-1134840	-1136082	-1136491	-1135060	-1131505	-1126172	-1118306	-1107311	-1092052	-1069415	-1037969	-994442	-937071	-862413	-766596	-645547	-493429	-303652	-70946	216267	567396	988700	1482885	2048803	2682520	3377620
22	2.75	0	0	0	0	0	0	0	0	0	0	0	0	0	0	0	0	0	0	0	0	-1144114	-1146757	-1150091	-1152670	-1153205	-1151790	-1148534	-1142809	-1133576	-1121135	-1103976	-1081249	-1050123	-1008616	-952655	-878701	-781721	-658585	-502861	-310600	-75039	211968	562769	983136	1476293	2046880	2687866	3389862
23	2.88	0	0	0	0	0	0	0	0	0	0	0	0	0	0	0	0	0	0	0	0	-1152092	-1150252	-1150079	-1149985	-1149529	-1147454	-1143319	-1136841	-1127581	-1115317	-1099327	-1077803	-1048638	-1007241	-951034	-874858	-774659	-646584	-486687	-288632	-48189	242046	592028	1005936	1491476	2049041	2680658	3376234
24	3.00	0	0	0	0	0	0	0	0	0	0	0	0	0	0	0	0	0	0	0	0	-1149529	-1151227	-1153963	-1156148	-1155913	-1153727	-1149592	-1143555	-1134844	-1122911	-1105742	-1082221	-1050887	-1008672	-952684	-878412	-781876	-660420	-507834	-320627	-90120	192882	537644	951427	1441275	2009735	2656477	3371564
25	3.13	0	0	0	0	0	0	0	0	0	0	0	0	0	0	0	0	0	0	0	0	-1157516	-1158287	-1160268	-1162453	-1162783	-1161478	-1158004	-1152344	-1144089	-1132203	-1115600	-1092284	-1060084	-1018090	-961992	-888600	-793479	-671615	-518384	-329903	-101220	174346	514327	927167	1425615	2012864	2679636	3409094
26	3.25	0	0	0	0	0	0	0	0	0	0	0	0	0	0	0	0	0	0	0	0	-1148365	-1150755	-1153852	-1155597	-1155408	-1153081	-1149356	-1143791	-1135474	-1123920	-1107413	-1084493	-1053178	-1010811	-953871	-879309	-782361	-657776	-500760	-306219	-68840	217005	559885	967957	1451299	2015397	2657296	3369481
27	3.38	0	0	0	0	0	0	0	0	0	0	0	0	0	0	0	0	0	0	0	0	-1169572	-1171443	-1173707	-1174367	-1172276	-1168157	-1162482	-1156068	-1147878	-1137439	-1122379	-1100669	-1069763	-1026752	-968617	-891681	-791149	-664630	-504564	-309677	-74688	208296	547481	950460	1428771	1991612	2638368	3357581
28	3.50	0	0	0	0	0	0	0	0	0	0	0	0	0	0	0	0	0	0	0	0	-1143389	-1144361	-1146400	-1147608	-1147310	-1145585	-1142479	-1137727	-1130747	-1119878	-1104052	-1081576	-1050379	-1008313	-952068	-877128	-778895	-653309	-494738	-299481	-63381	219803	562166	969886	1457378	2025348	2670799	3380902
29	3.63	0	0	0	0	0	0	0	0	0	0	0	0	0	0	0	0	0	0	0	0	-1139828	-1142181	-1145694	-1148408	-1149286	-1147874	-1144110	-1137632	-1128175	-1115690	-1098797	-1076353	-1045737	-1003639	-947473	-871873	-772025	-643914	-483633	-284267	-43210	248945	603165	1025927	1520477	2087976	2724754	3418953
30	3.75	0	0	0	0	0	0	0	0	0	0	0	0	0	0	0	0	0	0	0	0	-1142385	-1144142	-1147043	-1149380	-1149866	-1147749	-1143232	-1135954	-1125540	-1111847	-1093841	-1070048	-1038443	-995546	-938940	-864188	-768183	-647129	-495914	-308374	-79332	201515	544521	954578	1444972	2017788	2671128	3388995
31	3.88	0	0	0	0	0	0	0	0	0	0	0	0	0	0	0	0	0	0	0	0	-1155529	-1145255	-1136393	-1129712	-1124301	-1120034	-1115360	-1109463	-1104977	-1098829	-1090014	-1075365	-1049203	-1008705	-949512	-870195	-768779	-643427	-488746	-298116	-63898	222548	573286	989837	1476200	2037393	2666956	3362410
32	4.00	0	0	0	0	0	0	0	0	0	0	0	0	0	0	0	0	0	0	0	0	-1131045	-1144706	-1158979	-1168562	-1171778	-1169707	-1164484	-1155011	-1145679	-1131515	-1111141	-1083474	-1046631	-1000126	-944446	-875700	-788086	-672742	-524319	-331399	-93260	200213	551657	968223	1453927	2016831	2655397	3364010
33	4.13	0	0	0	0	0	0	0	0	0	0	0	0	0	0	0	0	0	0	0	0	-1145177	-1146714	-1149412	-1151686	-1151843	-1149396	-1144330	-1136582	-1126543	-1113557	-1096429	-1073545	-1042255	-999781	-943834	-869348	-771664	-646611	-488338	-292156	-54080	233794	581458	991766	1477595	2039934	2675645	3376306
34	4.25	0	0	0	0	0	0	0	0	0	0	0	0	0	0	0	0	0	0	0	0	-1138072	-1139279	-1141005	-1141412	-1139781	-1136158	-1131092	-1124379	-1116160	-1104758	-1088712	-1065970	-1034224	-991186	-934627	-861913	-765438	-642769	-485813	-292234	-55601	227049	567906	973697	1454194	2011310	2642190	3336687
35	4.38	0	0	0	0	0	0	0	0	0	0	0	0	0	0	0	0	0	0	0	0	-1160061	-1161583	-1164155	-1165724	-1165002	-1161598	-1155952	-1148816	-1139922	-1128473	-1112616	-1090124	-1058520	-1015575	-959158	-885848	-790094	-668538	-512430	-317377	-76619	218533	577756	1002275	1500087	2071774	2709383	3399394
36	4.50	0	0	0	0	0	0	0	0	0	0	0	0	0	0	0	0	0	0	0	0	-1164061	-1165284	-1167919	-1169849	-1170005	-1167135	-1161630	-1153709	-1143593	-1130261	-1112867	-1089559	-1057233	-1014446	-958593	-885111	-790502	-668680	-514328	-320702	-82453	210596	567310	992174	1489986	2061202	2697619	3393732
37	4.63	0	0	0	0	0	0	0	0	0	0	0	0	0	0	0	0	0	0	0	0	-1145318	-1146730	-1150290	-1153552	-1154807	-1152941	-1148204	-1140565	-1130527	-1117227	-1098437	-1072698	-1038161	-992974	-936149	-863247	-770786	-652336	-502329	-314193	-80602	206926	557178	982481	1485830	2067680	2718433	3422639
38	4.75	0	0	0	0	0	0	0	0	0	0	0	0	0	0	0	0	0	0	0	0	-1153913	-1156485	-1160297	-1162461	-1162351	-1158760	-1152752	-1144283	-1134041	-1121132	-1103691	-1079678	-1047038	-1003231	-946281	-872704	-777562	-654564	-499067	-303747	-65326	222187	570824	986308	1478725	2046882	2690028	3390830
39	4.88	0	0	0	0	0	0	0	0	0	0	0	0	0	0	0	0	0	0	0	0	-1145977	-1148471	-1151968	-1154289	-1153803	-1150557	-1145004	-1137240	-1127265	-1113949	-1095300	-1069389	-1034820	-990009	-932431	-858494	-765155	-643851	-490268	-296375	-58487	237134	594539	1017614	1519113	2090972	2731231	3427171
40	5.00	0	0	0	0	0	0	0	0	0	0	0	0	0	0	0	0	0	0	0	0	-1146275	-1146432	-1147671	-1148643	-1148110	-1145192	-1140722	-1133852	-1124583	-1112192	-1095300	-1071820	-1039102	-994589	-935537	-858259	-760685	-636871	-482253	-290870	-55946	228837	575388	988127	1477250	2046459	2689997	3398720
41	5.13	0	0	0	0	0	0	0	0	0	0	0	0	0	0	0	0	0	0	0	0	-1131766	-1133413	-1136048	-1137821	-1138213	-1135954	-1131892	-1125179	-1116113	-1103597	-1086187	-1062582	-1030570	-986700	-929404	-853334	-754208	-627382	-467996	-269021	-26695	270213	627947	1060370	1563265	2141476	2784245	3480185
42	5.25	0	0	0	0	0	0	0	0	0	0	0	0	0	0	0	0	0	0	0	0	-1142636	-1144581	-1147906	-1150180	-1150384	-1147843	-1143122	-1136252	-1127061	-1114576	-1096649	-1071538	-1037455	-992048	-933325	-857788	-760560	-636950	-482378	-288501	-50316	239236	591433	1010823	1503695	2072558	2713398	3419643
43	5.38	0	0	0	0	0	0	0	0	0	0	0	0	0	0	0	0	0	0	0	0	-1148847	-1147169	-1147247	-1148282	-1149004	-1147733	-1143734	-1136488	-1125728	-1110906	-1091488	-1065358	-1031150	-986872	-929828	-856549	-761689	-640761	-488276	-299120	-68133	215349	565067	983767	1479854	2048216	2682672	3374832
44	5.50	0	0	0	0	0	0	0	0	0	0	0	0	0	0	0	0	0	0	0	0	-1165175	-1164139	-1164045	-1163669	-1162022	-1157881	-1151702	-1143263	-1131829	-1117839	-1099629	-1075145	-1041580	-996534	-936854	-859043	-759713	-633844	-478285	-285898	-52888	231833	579027	997083	1494300	2067994	2710073	3413667
45	5.63	0	0	0	0	0	0	0	0	0	0	0	0	0	0	0	0	0	0	0	0	-1156940	-1157568	-1158744	-1159403	-1157819	-1153364	-1146353	-1137366	-1125853	-1111816	-1094076	-1070220	-1037973	-994417	-937717	-863388	-767822	-646408	-490989	-296987	-57546	234954	590712	1012501	1509592	2083694	2732016	3444738
46	5.75	0	0	0	0	0	0	0	0	0	0	0	0	0	0	0	0	0	0	0	0	-1154697	-1155576	-1157552	-1158634	-1157803	-1154980	-1150729	-1144769	-1136644	-1125101	-1108334	-1083505	-1048952	-1002447	-941889	-865348	-768496	-646768	-493483	-303496	-66424	223363	576674	999859	1497970	2075601	2719719	3427501
47	5.88	0	0	0	0	0	0	0	0	0	0	0	0	0	0	0	0	0	0	0	0	-1164249	-1164673	-1166037	-1166696	-1165331	-1161395	-1155340	-1146635	-1135201	-1120881	-1102044	-1077561	-1045219	-1002730	-947379	-874414	-779962	-658736	-506015	-316451	-84994	195806	538717	951190	1444344	2019042	2665450	3376102
48	6.00	0	0	0	0	0	0	0	0	0	0	0	0	0	0	0	0	0	0	0	0	-1156642	-1156752	-1158132	-1158948	-1158164	-1155811	-1151796	-1145302	-1136911	-1124959	-1108726	-1085309	-1053406	-1009458	-951253	-874602	-776354	-651944	-497937	-311887	-86798	185877	520429	929043	1421319	1999201	2650346	3360057
49	6.13	0	0	0	0	0	0	0	0	0	0	0	0	0	0	0	0	0	0	0	0	-1165222	-1167417	-1170648	-1172750	-1172954	-1170727	-1166367	-1158760	-1147686	-1132237	-1111612	-1084681	-1049815	-1003655	-944305	-867858	-770880	-649905	-500619	-314365	-87425	195696	542529	965934	1468342	2049863	2697478	3401260
50	6.25	0	0	0	0	0	0	0	0	0	0	0	0	0	0	0	0	0	0	0	0	-1145522	-1147435	-1150666	-1153317	-1153835	-1151482	-1146369	-1138056	-1126622	-1111769	-1092273	-1066785	-1033063	-988739	-930737	-854620	-756670	-631727	-474364	-280628	-46630	235048	573851	980238	1459872	2020972	2657043	3355556
51	6.38	0	0	0	0	0	0	0	0	0	0	0	0	0	0	0	0	0	0	0	0	-1174946	-1171919	-1170303	-1169096	-1166743	-1162304	-1155089	-1145537	-1134198	-1119925	-1101966	-1077702	-1045141	-1000502	-941936	-866587	-770300	-649811	-499051	-311009	-78595	208589	559405	981681	1477486	2052278	2697886	3401308
52	6.50	0	0	0	0	0	0	0	0	0	0	0	0	0	0	0	0	0	0	0	0	-1167825	-1169535	-1172186	-1173691	-1172687	-1168766	-1162430	-1153756	-1142808	-1129775	-1112819	-1089779	-1057892	-1014477	-956884	-881253	-784055	-658798	-499600	-299418	-55523	238248	590743	1003545	1486034	2042303	2666141	3351493
53	6.63	0	0	0	0	0	0	0	0	0	0	0	0	0	0	0	0	0	0	0	0	-1181016	-1181094	-1182177	-1182428	-1180561	-1176342	-1170037	-1161630	-1151027	-1137695	-1120348	-1096178	-1062409	-1017348	-957872	-881896	-785577	-663221	-509309	-316702	-80006	205295	548708	956052	1437506	1998574	2632638	3332358
54	6.75	0	0	0	0	0	0	0	0	0	0	0	0	0	0	0	0	0	0	0	0	-1175181	-1176860	-1179620	-1181455	-1181455	-1178554	-1173644	-1165535	-1154556	-1139530	-1119674	-1092649	-1056449	-1009725	-951080	-876437	-783334	-665417	-514187	-326238	-95189	183901	523174	926973	1408630	1977337	2624090	3337205
55	6.88	0	0	0	0	0	0	0	0	0	0	0	0	0	0	0	0	0	0	0	0	-1187980	-1186913	-1186851	-1186584	-1184702	-1180608	-1174146	-1164798	-1153411	-1138715	-1120772	-1097417	-1066001	-1023825	-967110	-892373	-795631	-670828	-513183	-316875	-76289	211694	552896	952398	1423280	1966138	2588188	3283814
56	7.00	0	0	0	0	0	0	0	0	0	0	0	0	0	0	0	0	0	0	0	0	-1177863	-1177754	-1178867	-1179118	-1177910	-1174272	-1168453	-1160312	-1149427	-1134966	-1116333	-1090861	-1056857	-1011074	-952586	-876861	-781201	-660367	-507897	-315698	-77277	212180	563515	979014	1464656	2018682	2640873	3328657
57	7.13	0	0	0	0	0	0	0	0	0	0	0	0	0	0	0	0	0	0	0	0	-1168453	-1166555	-1165708	-1165378	-1163418	-1159277	-1152548	-1143514	-1131986	-1118403	-1100444	-1076431	-1042584	-997381	-937058	-859733	-762144	-640118	-488840	-300704	-71207	208902	549571	953919	1432800	1988175	2616546	3306165
58	7.25	0	0	0	0	0	0	0	0	0	0	0	0	0	0	0	0	0	0	0	0	-1174287	-1174711	-1176169	-1177079	-1176122	-1172797	-1167010	-1158760	-1148267	-1133962	-1115282	-1089497	-1054740	-1008941	-949763	-875292	-780809	-660916	-510987	-321768	-89088	194363	540396	952555	1441521	2006981	2644653	3339353
59	7.38	0	0	0	0	0	0	0	0	0	0	0	0	0	0	0	0	0	0	0	0	-1186019	-1185282	-1185863	-1186584	-1185831	-1182788	-1176938	-1168359	-1156485	-1140832	-1120536	-1094484	-1060511	-1016548	-958907	-883574	-785577	-662076	-507489	-316875	-82924	204652	556896	977697	1472357	2041989	2674673	3362551
60	7.50	0	0	0	0	0	0	0	0	0	0	0	0	0	0	0	0	0	0	0	0	-1163810	-1162257	-1162508	-1163057	-1161975	-1158540	-1151717	-1141961	-1129586	-1114608	-1095363	-1070079	-1035840	-989978	-929639	-853601	-755839	-633656	-481202	-290164	-54519	230061	577160	987594	1472623	2030523	2659192	3350176
61	7.63	0	0	0	0	0	0	0	0	0	0	0	0	0	0	0	0	0	0	0	0	-1194881	-1194254	-1194364	-1193768	-1191227	-1186427	-1179620	-1170696	-1159371	-1145083	-1125995	-1100774	-1066456	-1021598	-963048	-886664	-789247	-665574	-510375	-316938	-78689	211129	562824	974529	1456672	2011624	2630615	3316878
62	7.75	0	0	0	0	0	0	0	0	0	0	0	0	0	0	0	0	0	0	0	0	-1172782	-1177111	-1181455	-1182773	-1180216	-1174585	-1167308	-1158022	-1146886	-1132221	-1112255	-1084917	-1048811	-1000706	-939631	-861788	-762881	-637844	-481814	-289286	-53311	231959	577317	986998	1465283	2016768	2636810	3317097
63	7.88	0	0	0	0	0	0	0	0	0	0	0	0	0	0	0	0	0	0	0	0	-1185094	-1183039	-1182192	-1181141	-1178773	-1174852	-1168908	-1161206	-1150980	-1137491	-1118858	-1092979	-1057704	-1010791	-950641	-873128	-775115	-651630	-497843	-305535	-72886	210424	553743	963126	1444972	2004377	2637344	3330053
64	8.00	0	0	0	0	0	0	0	0	0	0	0	0	0	0	0	0	0	0	0	0	-1184529	-1185596	-1187666	-1189439	-1189235	-1186004	-1179463	-1170303	-1158007	-1142902	-1123752	-1098907	-1065405	-1020579	-962859	-888217	-792572	-672820	-522735	-334818	-104396	178255	524037	937372	1426072	1990512	2626333	3316046
65	8.13	0	0	0	0	0	0	0	0	0	0	0	0	0	0	0	0	0	0	0	0	-1168139	-1167088	-1167386	-1166869	-1164547	-1160328	-1153991	-1145632	-1134856	-1121148	-1102577	-1077263	-1043117	-997240	-937450	-860455	-762316	-638330	-483555	-291246	-54347	229920	573459	981069	1456311	2011514	2637218	3327904
66	8.25	0	0	0	0	0	0	0	0	0	0	0	0	0	0	0	0	0	0	0	0	-1156846	-1157960	-1161002	-1163935	-1164924	-1162979	-1157379	-1148486	-1136001	-1119768	-1099676	-1073185	-1038333	-993005	-934643	-860188	-764465	-644023	-490315	-298822	-61593	224430	572470	984598	1469643	2028328	2652385	3325708
67	8.38	0	0	0	0	0	0	0	0	0	0	0	0	0	0	0	0	0	0	0	0	-1179934	-1180671	-1182428	-1183024	-1181753	-1178036	-1171793	-1163685	-1153097	-1138887	-1120395	-1095065	-1061155	-1015136	-955315	-877771	-778879	-654156	-500165	-309989	-76587	205185	551030	964145	1451434	2014321	2645358	3333880
68	8.50	0	0	0	0	0	0	0	0	0	0	0	0	0	0	0	0	0	0	0	0	-1181722	-1181079	-1181251	-1180247	-1177597	-1172844	-1166963	-1159246	-1149380	-1135970	-1117588	-1091943	-1057406	-1011419	-951959	-875716	-779099	-658061	-507332	-317392	-81983	207099	560629	976505	1461095	2013145	2630835	3304000
69	8.63	0	0	0	0	0	0	0	0	0	0	0	0	0	0	0	0	0	0	0	0	-1185392	-1187133	-1190003	-1191321	-1189595	-1184561	-1176640	-1166163	-1153741	-1139656	-1121760	-1096821	-1062864	-1016563	-956256	-879857	-782753	-659943	-507191	-316357	-86202	193500	531048	937388	1418214	1972020	2594007	3270279
70	8.75	0	0	0	0	0	0	0	0	0	0	0	0	0	0	0	0	0	0	0	0	-1180263	-1179871	-1181094	-1181910	-1181173	-1177456	-1170837	-1160908	-1147890	-1131500	-1110624	-1083881	-1048811	-1003388	-945042	-869395	-772025	-647223	-490393	-296548	-61483	218438	552818	945857	1410889	1950156	2563344	3243223
71	8.88	0	0	0	0	0	0	0	0	0	0	0	0	0	0	0	0	0	0	0	0	-1181816	-1183212	-1185596	-1186490	-1185000	-1180718	-1174836	-1166759	-1156862	-1143483	-1124630	-1098499	-1062974	-1015685	-954578	-875120	-773609	-645168	-486645	-293913	-61985	216133	552959	956335	1432706	1985023	2604375	3286214
72	9.00	0	0	0	0	0	0	0	0	0	0	0	0	0	0	0	0	0	0	0	0	-1178930	-1176907	-1176765	-1176734	-1175668	-1172060	-1165080	-1154603	-1140989	-1124034	-1103017	-1076337	-1042004	-996801	-938297	-862619	-764340	-641436	-486535	-294367	-59475	229606	579858	995468	1480074	2031653	2646817	3318258
73	9.13	0	0	0	0	0	0	0	0	0	0	0	0	0	0	0	0	0	0	0	0	-1157709	-1159732	-1163245	-1165582	-1166053	-1163653	-1158995	-1150917	-1140377	-1125649	-1106357	-1080164	-1045470	-998777	-938282	-860392	-761391	-638801	-485735	-296155	-63491	219787	563264	974764	1458194	2020125	2656949	3348184
74	9.25	0	0	0	0	0	0	0	0	0	0	0	0	0	0	0	0	0	0	0	0	-1131829	-1133319	-1136189	-1138228	-1138464	-1136707	-1133398	-1127453	-1118733	-1105558	-1087112	-1061186	-1026413	-981210	-922770	-848299	-753925	-633844	-482959	-292313	-56746	229763	577788	986935	1464891	2012910	2625423	3295986
75	9.38	0	0	0	0	0	0	0	0	0	0	0	0	0	0	0	0	0	0	0	0	-1162932	-1164735	-1167167	-1167841	-1165394	-1160077	-1153348	-1144487	-1133884	-1120583	-1103315	-1079113	-1045690	-1000989	-942438	-865599	-768371	-644353	-489327	-295011	-56260	232837	581332	990668	1470569	2021677	2645076	3329880
76	9.50	0	0	0	0	0	0	0	0	0	0	0	0	0	0	0	0	0	0	0	0	-1173158	-1172938	-1173738	-1173895	-1172201	-1168766	-1163496	-1156156	-1146055	-1132237	-1113290	-1087285	-1052983	-1007592	-949339	-873787	-775821	-652634	-496965	-303480	-67678	218533	564597	978215	1464154	2022117	2651287	3336060
77	9.63	0	0	0	0	0	0	0	0	0	0	0	0	0	0	0	0	0	0	0	0	-1159403	-1157160	-1155983	-1154666	-1152235	-1148188	-1142369	-1134747	-1124457	-1110435	-1091238	-1065107	-1030178	-984677	-926910	-852377	-757752	-637185	-484574	-293238	-55790	231849	578791	986778	1461613	2009490	2627557	3307812
78	9.75	0	0	0	0	0	0	0	0	0	0	0	0	0	0	0	0	0	0	0	0	-1169958	-1167198	-1165739	-1165018	-1163983	-1161630	-1157693	-1150855	-1141177	-1127422	-1108443	-1083348	-1048826	-1002761	-942767	-863780	-763258	-636416	-478787	-284125	-45657	242797	591888	1002777	1484528	2038334	2657247	3339589
79	9.88	0	0	0	0	0	0	0	0	0	0	0	0	0	0	0	0	0	0	0	0	-1141020	-1139985	-1140377	-1140754	-1139546	-1136456	-1131406	-1124065	-1114372	-1101134	-1082156	-1055163	-1017708	-968945	-907258	-830874	-736907	-617971	-469141	-280424	-45453	244977	597440	1015607	1498393	2049988	2659961	3329849
80	10.00	0	0	0	0	0	0	0	0	0	0	0	0	0	0	0	0	0	0	0	0	-1174225	-1173880	-1174083	-1173095	-1170131	-1164986	-1158289	-1149443	-1138103	-1123736	-1104946	-1079553	-1045941	-1001271	-942485	-866478	-769767	-646047	-491319	-301425	-68635	210722	547689	948665	1429146	1993445	2634050	3343306
81	10.13	0	0	0	0	0	0	0	0	0	0	0	0	0	0	0	0	0	0	0	0	-1157646	-1158791	-1160626	-1161379	-1160108	-1156548	-1151074	-1143514	-1132974	-1118827	-1099692	-1073828	-1039259	-993789	-935129	-859404	-762238	-638612	-483492	-290964	-57123	227143	570933	980975	1463950	2018886	2634771	3304377
82	10.25	0	0	0	0	0	0	0	0	0	0	0	0	0	0	0	0	0	0	0	0	-1164249	-1164971	-1167731	-1170272	-1170790	-1168029	-1162053	-1152988	-1140503	-1124818	-1104444	-1077357	-1042223	-996613	-938203	-864548	-770676	-651301	-499506	-307982	-69812	220258	569365	981414	1464593	2019466	2644543	3328155
83	10.38	0	0	0	0	0	0	0	0	0	0	0	0	0	0	0	0	0	0	0	0	-1184137	-1180922	-1178601	-1176499	-1173393	-1168939	-1162555	-1154023	-1142448	-1127924	-1108475	-1082972	-1048513	-1002886	-943442	-867780	-772982	-654093	-505309	-315746	-82014	208212	559829	975438	1463495	2023528	2651868	3339353
84	10.50	0	0	0	0	0	0	0	0	0	0	0	0	0	0	0	0	0	0	0	0	-1160218	-1161002	-1162289	-1162885	-1161034	-1157097	-1150933	-1143044	-1131845	-1117133	-1096806	-1070001	-1034867	-989743	-932651	-860580	-768010	-650470	-501247	-313205	-81622	201625	545681	954264	1436314	1992630	2619134	3307875
85	10.63	0	0	0	0	0	0	0	0	0	0	0	0	0	0	0	0	0	0	0	0	-1175730	-1175417	-1176452	-1177063	-1175777	-1171856	-1165096	-1155184	-1142808	-1127422	-1107895	-1082250	-1048576	-1003200	-944414	-868517	-772809	-651897	-500416	-308829	-74501	215176	563217	977085	1463056	2024610	2652997	3339526
86	10.75	0	0	0	0	0	0	0	0	0	0	0	0	0	0	0	0	0	0	0	0	-1170774	-1171543	-1173503	-1175260	-1175260	-1172358	-1166508	-1156893	-1143200	-1126089	-1104569	-1077357	-1042866	-997648	-939395	-863058	-766065	-642941	-486394	-292611	-53594	236617	584720	995609	1475400	2027465	2650691	3335621
87	10.88	0	0	0	0	0	0	0	0	0	0	0	0	0	0	0	0	0	0	0	0	-1176703	-1176624	-1177001	-1176217	-1173299	-1167966	-1160281	-1151121	-1139938	-1125979	-1107251	-1082297	-1048685	-1003749	-946045	-872359	-778785	-661073	-511567	-325376	-91456	195727	545085	960224	1446916	2004283	2626898	3309443
88	11.00	0	0	0	0	0	0	0	0	0	0	0	0	0	0	0	0	0	0	0	0	-1184608	-1182882	-1182992	-1183290	-1182333	-1179040	-1172719	-1163481	-1151654	-1136942	-1118591	-1094155	-1062064	-1018006	-959895	-882476	-783867	-658579	-503458	-312122	-79112	204213	548740	960444	1442399	1996331	2615981	3297037
89	11.13	0	0	0	0	0	0	0	0	0	0	0	0	0	0	0	0	0	0	0	0	-1154901	-1157850	-1162445	-1166194	-1167590	-1165018	-1159230	-1149772	-1137193	-1121242	-1101213	-1075396	-1041455	-996738	-938407	-862682	-767743	-646627	-494753	-303904	-68541	218846	564503	971925	1451183	2003499	2630035	3321269
90	11.25	0	0	0	0	0	0	0	0	0	0	0	0	0	0	0	0	0	0	0	0	-1165535	-1164955	-1165614	-1165833	-1164971	-1162038	-1157332	-1150196	-1140236	-1126324	-1107408	-1081356	-1046991	-1000502	-940807	-864329	-767320	-645529	-492573	-303574	-70847	214031	557884	969698	1457315	2022101	2656745	3350035
91	11.38	0	0	0	0	0	0	0	0	0	0	0	0	0	0	0	0	0	0	0	0	-1160877	-1158885	-1158556	-1158430	-1157913	-1155968	-1152031	-1146055	-1138056	-1126089	-1108491	-1084132	-1049375	-1002730	-943520	-867466	-771570	-649121	-496996	-303794	-67835	218297	564017	975203	1457990	2017976	2649248	3341094
92	11.50	0	0	0	0	0	0	0	0	0	0	0	0	0	0	0	0	0	0	0	0	-1185643	-1182773	-1180906	-1179510	-1177565	-1174381	-1169362	-1162069	-1152235	-1138950	-1121321	-1096821	-1063350	-1017661	-957746	-880421	-782597	-660963	-508713	-321125	-90672	191038	529307	934015	1409054	1957308	2578966	3264052
93	11.63	0	0	0	0	0	0	0	0	0	0	0	0	0	0	0	0	0	0	0	0	-1160124	-1161677	-1164406	-1166147	-1165488	-1162665	-1157740	-1150462	-1140393	-1126528	-1107753	-1081952	-1047932	-1003373	-945261	-870430	-774472	-652525	-500855	-311495	-79363	204777	547454	956993	1438039	1993022	2619071	3308565
94	11.75	0	0	0	0	0	0	0	0	0	0	0	0	0	0	0	0	0	0	0	0	-1184670	-1184294	-1184796	-1184827	-1183494	-1180781	-1176530	-1170068	-1160406	-1146965	-1128018	-1102734	-1069122	-1024813	-966671	-890993	-793654	-669338	-515002	-323839	-89574	194159	541886	955425	1448783	2012737	2642896	3325724
95	11.88	0	0	0	0	0	0	0	0	0	0	0	0	0	0	0	0	0	0	0	0	-1194144	-1193454	-1193626	-1193062	-1189752	-1183792	-1175605	-1165331	-1154023	-1140456	-1123344	-1099425	-1066268	-1022367	-964836	-892592	-800383	-682702	-532741	-340919	-104474	185124	533683	946814	1430181	1990308	2617267	3307843
96	12.00	0	0	0	0	0	0	0	0	0	0	0	0	0	0	0	0	0	0	0	0	-1181706	-1179636	-1179369	-1179353	-1178397	-1175542	-1169849	-1161065	-1149239	-1133743	-1114074	-1088916	-1056747	-1014054	-958405	-884656	-787537	-662970	-505623	-310115	-70596	217074	565632	974968	1449834	1993445	2604861	3275251
97	12.13	0	0	0	0	0	0	0	0	0	0	0	0	0	0	0	0	0	0	0	0	-1186725	-1188498	-1191085	-1192011	-1190615	-1187243	-1182255	-1175354	-1166116	-1153521	-1135641	-1110592	-1076808	-1030695	-970623	-893549	-795740	-673887	-523111	-337908	-108364	171887	516335	930471	1416802	1975094	2599607	3282136
98	12.25	0	0	0	0	0	0	0	0	0	0	0	0	0	0	0	0	0	0	0	0	-1178224	-1178585	-1179855	-1180530	-1179291	-1175683	-1170147	-1162838	-1153019	-1139922	-1121838	-1096790	-1062425	-1017426	-959299	-884358	-788886	-667331	-514594	-324513	-90845	192465	537541	946469	1425303	1978074	2601332	3288081
99	12.38	0	0	0	0	0	0	0	0	0	0	0	0	0	0	0	0	0	0	0	0	-1185031	-1184498	-1185078	-1185517	-1184968	-1182710	-1178318	-1171213	-1161536	-1148173	-1129461	-1104648	-1071444	-1027370	-970592	-897517	-805716	-686968	-538702	-349499	-114669	172624	517496	926612	1402576	1953481	2570857	3254171
100	12.50	0	0	0	0	0	0	0	0	0	0	0	0	0	0	0	0	0	0	0	0	-1178836	-1172938	-1170225	-1169080	-1169676	-1170225	-1169002	-1163057	-1153741	-1139436	-1120395	-1094469	-1060402	-1015607	-958154	-884421	-789921	-668303	-516257	-328826	-103925	161943	486315	876265	1349594	1917767	2565508	3283313
101	12.63	0	0	0	0	0	0	0	0	0	0	0	0	0	0	0	0	0	0	0	0	-1182475	-1183008	-1184325	-1184561	-1182537	-1178271	-1172076	-1164453	-1154666	-1141099	-1122560	-1096868	-1062739	-1019010	-963628	-893000	-801057	-681823	-528820	-335806	-96601	193171	542984	953292	1434886	1988834	2612813	3300989
102	12.75	0	0	0	0	0	0	0	0	0	0	0	0	0	0	0	0	0	0	0	0	-1186113	-1187792	-1190835	-1193093	-1192968	-1190317	-1185016	-1177534	-1167182	-1153317	-1134574	-1108271	-1072918	-1026256	-967126	-892718	-798564	-679973	-528020	-337437	-100271	189579	542842	965416	1463244	2033049	2662925	3344373
103	12.88	0	0	0	0	0	0	0	0	0	0	0	0	0	0	0	0	0	0	0	0	-1188043	-1188498	-1189893	-1190301	-1188545	-1184184	-1178020	-1170178	-1160752	-1148188	-1130810	-1106624	-1073781	-1030005	-973258	-899776	-805857	-686607	-536035	-346127	-109384	183760	542952	972270	1472592	2040107	2669011	3349188
104	13.00	0	0	0	0	0	0	0	0	0	0	0	0	0	0	0	0	0	0	0	0	-1182741	-1182177	-1182569	-1182710	-1181722	-1179557	-1176044	-1169958	-1160971	-1147686	-1128504	-1102452	-1067350	-1021912	-963863	-890271	-797403	-678435	-529322	-340935	-110638	170993	510218	912873	1392930	1955018	2590839	3291390
105	13.13	0	0	0	0	0	0	0	0	0	0	0	0	0	0	0	0	0	0	0	0	-1183369	-1185047	-1187854	-1189752	-1189454	-1186459	-1180593	-1171856	-1160234	-1145334	-1126700	-1102593	-1071365	-1030005	-975517	-903493	-809009	-686780	-531926	-338739	-101902	185093	531236	941105	1424284	1987987	2626380	3330272
106	13.25	0	0	0	0	0	0	0	0	0	0	0	0	0	0	0	0	0	0	0	0	-1197140	-1195822	-1195336	-1194348	-1191964	-1187682	-1181863	-1174679	-1164720	-1151764	-1134088	-1109965	-1077623	-1034522	-978654	-904387	-808900	-685070	-528256	-335383	-101871	178458	512665	912120	1385292	1936981	2560756	3251081
107	13.38	0	0	0	0	0	0	0	0	0	0	0	0	0	0	0	0	0	0	0	0	-1195320	-1197861	-1201735	-1204747	-1205013	-1202237	-1196622	-1187839	-1176169	-1161112	-1141554	-1116160	-1082909	-1040702	-986371	-915853	-824663	-706181	-554888	-362893	-126229	164091	516775	935255	1428346	1995029	2625251	3312125
108	13.50	0	0	0	0	0	0	0	0	0	0	0	0	0	0	0	0	0	0	0	0	-1179604	-1182867	-1187258	-1190411	-1190693	-1187086	-1180310	-1170931	-1158901	-1144110	-1124912	-1099974	-1066346	-1021927	-964961	-891510	-797717	-679220	-528695	-338723	-101949	188701	543438	964773	1458821	2023748	2652417	3334460
109	13.63	0	0	0	0	0	0	0	0	0	0	0	0	0	0	0	0	0	0	0	0	-1186788	-1185894	-1186757	-1187494	-1186380	-1182835	-1176687	-1168531	-1158399	-1145883	-1128849	-1105385	-1073294	-1030287	-973744	-900294	-805810	-684301	-530263	-336120	-95895	195586	550638	968082	1459809	2025802	2658063	3348388
110	13.75	0	0	0	0	0	0	0	0	0	0	0	0	0	0	0	0	0	0	0	0	-1179620	-1180342	-1182192	-1183149	-1182208	-1179087	-1173927	-1166257	-1155858	-1142526	-1123924	-1098923	-1066236	-1022759	-967424	-896043	-805386	-687266	-537698	-348495	-114748	173345	523550	945073	1442242	2014149	2655130	3355085
111	13.88	0	0	0	0	0	0	0	0	0	0	0	0	0	0	0	0	0	0	0	0	-1189642	-1189062	-1189846	-1190489	-1190082	-1187384	-1182208	-1173911	-1162304	-1146918	-1126340	-1100303	-1066377	-1022570	-965981	-892059	-796713	-675471	-524695	-337798	-110011	170224	513544	930596	1427138	2001099	2640026	3332044
112	14.00	0	0	0	0	0	0	0	0	0	0	0	0	0	0	0	0	0	0	0	0	-1179353	-1180514	-1183024	-1185219	-1185815	-1183839	-1179824	-1172813	-1162822	-1148659	-1129288	-1103409	-1069107	-1025111	-969321	-898411	-807519	-691438	-543736	-354455	-118763	169926	523974	943834	1437019	2004989	2637093	3320485
113	14.13	0	0	0	0	0	0	0	0	0	0	0	0	0	0	0	0	0	0	0	0	-1190521	-1188184	-1186804	-1185768	-1183620	-1179730	-1173942	-1166131	-1155717	-1141977	-1124003	-1099378	-1066519	-1023276	-967627	-896514	-806202	-690324	-542560	-354957	-120975	166052	516398	937341	1437506	2009930	2646692	3336609
114	14.25	0	0	0	0	0	0	0	0	0	0	0	0	0	0	0	0	0	0	0	0	-1165927	-1169253	-1173895	-1177409	-1178161	-1175652	-1170523	-1162414	-1152501	-1139577	-1122842	-1100021	-1068526	-1026460	-970702	-897894	-802751	-681839	-526954	-333375	-94624	195617	544521	956915	1440862	1998088	2625831	3315403
115	14.38	0	0	0	0	0	0	0	0	0	0	0	0	0	0	0	0	0	0	0	0	-1175746	-1174413	-1174272	-1173519	-1171370	-1167872	-1163355	-1157191	-1149694	-1139201	-1123924	-1100742	-1067413	-1020939	-960522	-883009	-785483	-662578	-508979	-316028	-79144	205561	547658	952366	1423280	1973871	2596815	3290229
116	14.50	0	0	0	0	0	0	0	0	0	0	0	0	0	0	0	0	0	0	0	0	-1166790	-1165253	-1165394	-1165284	-1164092	-1160814	-1155482	-1148063	-1139013	-1126951	-1110953	-1087693	-1055618	-1011732	-954484	-880249	-785357	-663268	-506768	-308264	-64087	232429	585097	1001161	1487414	2051713	2688146	3389121
117	14.63	0	0	0	0	0	0	0	0	0	0	0	0	0	0	0	0	0	0	0	0	-1155732	-1156799	-1158901	-1160328	-1159952	-1156877	-1151435	-1143012	-1132488	-1118388	-1100272	-1076416	-1044403	-1002086	-947096	-875606	-784306	-666703	-516194	-327007	-90641	197578	546356	956240	1438745	1995719	2624388	3321363
118	14.75	0	0	0	0	0	0	0	0	0	0	0	0	0	0	0	0	0	0	0	0	-1167543	-1170805	-1174868	-1177424	-1177001	-1173095	-1166555	-1158195	-1147482	-1134543	-1117525	-1094139	-1061327	-1017802	-960444	-886836	-793403	-674342	-522139	-327713	-86421	207945	561978	976881	1462883	2024469	2660212	3360575
119	14.88	0	0	0	0	0	0	0	0	0	0	0	0	0	0	0	0	0	0	0	0	-1162571	-1164484	-1167888	-1170664	-1171401	-1169080	-1163998	-1156674	-1146980	-1134480	-1117290	-1093229	-1059900	-1015199	-957809	-883919	-789561	-668570	-513042	-317988	-76477	213215	560425	973321	1461221	2033943	2684413	3402405
120	15.00	0	0	0	0	0	0	0	0	0	0	0	0	0	0	0	0	0	0	0	0	-1166994	-1169315	-1173095	-1176264	-1176954	-1174130	-1168139	-1159011	-1147137	-1133068	-1115392	-1092759	-1062300	-1021300	-967345	-895557	-802798	-680961	-523676	-322129	-69733	234688	595637	1014273	1493405	2044906	2664886	3358002
121	15.13	0	0	0	0	0	0	0	0	0	0	0	0	0	0	0	0	0	0	0	0	-1163528	-1160579	-1158650	-1157066	-1155011	-1152219	-1148141	-1142432	-1134339	-1122309	-1104789	-1079945	-1046568	-1002526	-944963	-871685	-777374	-658093	-507458	-316796	-80257	212510	569992	996471	1497295	2071539	2714888	3415439
122	15.25	0	0	0	0	0	0	0	0	0	0	0	0	0	0	0	0	0	0	0	0	-1157630	-1160454	-1164061	-1166884	-1167245	-1164688	-1159732	-1152392	-1142181	-1128598	-1110169	-1085654	-1052857	-1009364	-952853	-879653	-786502	-668021	-518782	-329234	-93558	199884	556708	982465	1480842	2051400	2684868	3376761
123	15.38	0	0	0	0	0	0	0	0	0	0	0	0	0	0	0	0	0	0	0	0	-1163543	-1163496	-1164986	-1166288	-1166304	-1164139	-1159560	-1152172	-1141507	-1127626	-1109416	-1085042	-1053140	-1009850	-953119	-877833	-780636	-655614	-499914	-305190	-68416	220838	571639	990731	1483289	2055525	2698576	3403817
124	15.50	0	0	0	0	0	0	0	0	0	0	0	0	0	0	0	0	0	0	0	0	-1161034	-1162006	-1163245	-1163371	-1161473	-1158085	-1153411	-1147765	-1140189	-1128880	-1112757	-1089387	-1056528	-1013505	-957119	-885158	-791568	-673322	-521731	-328654	-89935	207475	571106	1006306	1515709	2098689	2747481	3450275
125	15.63	0	0	0	0	0	0	0	0	0	0	0	0	0	0	0	0	0	0	0	0	-1163167	-1162791	-1163387	-1163057	-1161002	-1156454	-1150353	-1143138	-1134715	-1124222	-1109588	-1088148	-1056982	-1013160	-953998	-875794	-777076	-652587	-499302	-309425	-75317	212745	564754	986904	1481470	2050804	2687785	3386454
126	15.75	0	0	0	0	0	0	0	0	0	0	0	0	0	0	0	0	0	0	0	0	-1143906	-1145067	-1147467	-1149506	-1150447	-1149819	-1147780	-1144016	-1136629	-1125289	-1107267	-1081795	-1047368	-1002918	-946328	-873677	-780589	-660602	-506642	-312797	-73952	216603	565554	980191	1470600	2038209	2680947	3391740
127	15.88	0	0	0	0	0	0	0	0	0	0	0	0	0	0	0	0	0	0	0	0	-1148596	-1145287	-1143561	-1141914	-1141538	-1141554	-1141365	-1138558	-1130543	-1117384	-1096555	-1069012	-1034632	-992221	-939003	-868736	-775099	-652352	-492338	-291419	-47351	248427	603714	1022884	1516195	2081875	2713586	3404413
128	16.00	0	0	0	0	0	0	0	0	0	0	0	0	0	0	0	0	0	0	0	0	-1149866	-1148894	-1149145	-1148957	-1147561	-1144189	-1138574	-1131265	-1121477	-1108726	-1091567	-1068322	-1036577	-993523	-937043	-862541	-766881	-645419	-491758	-298979	-61656	226720	576392	990056	1475619	2034256	2665309	3357344
129	16.13	0	0	0	0	0	0	0	0	0	0	0	0	0	0	0	0	0	0	0	0	-1128943	-1130480	-1133335	-1135201	-1135468	-1133413	-1129367	-1122905	-1114247	-1102483	-1086501	-1064558	-1034350	-992080	-935443	-860078	-761595	-636950	-479336	-281992	-40779	252333	604545	1024217	1517121	2085843	2727499	3425964
130	16.25	0	0	0	0	0	0	0	0	0	0	0	0	0	0	0	0	0	0	0	0	-1159622	-1160046	-1162100	-1163794	-1163355	-1160093	-1154133	-1145741	-1135656	-1122920	-1105620	-1081278	-1046772	-1000408	-941591	-867042	-772731	-653779	-502941	-310664	-72086	219176	573443	996409	1493076	2067006	2709728	3412397
131	16.38	0	0	0	0	0	0	0	0	0	0	0	0	0	0	0	0	0	0	0	0	-1130982	-1133131	-1136833	-1140220	-1141114	-1139421	-1134872	-1127453	-1117713	-1104758	-1087065	-1062974	-1030036	-986198	-928981	-855797	-761219	-640542	-487178	-294399	-57970	230657	581442	999169	1500228	2085247	2744861	3463999
132	16.50	0	0	0	0	0	0	0	0	0	0	0	0	0	0	0	0	0	0	0	0	-1141475	-1142840	-1144910	-1146181	-1145663	-1143028	-1138872	-1132457	-1123469	-1110733	-1093026	-1068918	-1035793	-992268	-935270	-861647	-767006	-646188	-492103	-295497	-52558	248490	611823	1042333	1543722	2121259	2765690	3470774
133	16.63	0	0	0	0	0	0	0	0	0	0	0	0	0	0	0	0	0	0	0	0	-1142746	-1143812	-1146432	-1148784	-1149396	-1147874	-1144189	-1138009	-1129602	-1117650	-1101197	-1077561	-1044748	-999765	-940132	-862541	-762269	-637091	-480386	-287027	-50755	235190	583183	999044	1490739	2064402	2717837	3438198
134	16.75	0	0	0	0	0	0	0	0	0	0	0	0	0	0	0	0	0	0	0	0	-1158697	-1157677	-1157866	-1157411	-1155387	-1151262	-1145161	-1137460	-1128190	-1115972	-1099237	-1075647	-1042992	-998887	-941324	-867262	-771664	-649937	-495397	-298853	-54441	247957	612639	1043807	1543157	2112711	2754711	3454682
135	16.88	0	0	0	0	0	0	0	0	0	0	0	0	0	0	0	0	0	0	0	0	-1122560	-1126355	-1132237	-1138228	-1141946	-1141475	-1136786	-1127124	-1113996	-1098374	-1079490	-1056057	-1025551	-984112	-929890	-858526	-765375	-644870	-491726	-297944	-59224	229810	582132	1002259	1497154	2069123	2714967	3426152
136	17.00	0	0	0	0	0	0	0	0	0	0	0	0	0	0	0	0	0	0	0	0	-1112192	-1115329	-1119830	-1122905	-1123595	-1121462	-1117117	-1110765	-1102436	-1091645	-1076965	-1055696	-1025660	-983798	-927287	-852769	-754929	-629202	-468701	-265696	-17943	280361	638675	1060825	1559092	2132003	2780826	3487243
137	17.13	0	0	0	0	0	0	0	0	0	0	0	0	0	0	0	0	0	0	0	0	-1112882	-1114796	-1117964	-1120081	-1119940	-1117337	-1112741	-1105777	-1096837	-1084634	-1068636	-1046584	-1015873	-973948	-918096	-843876	-748091	-625673	-469799	-274087	-32765	262669	621595	1051995	1563766	2159278	2822610	3540712
138	17.25	0	0	0	0	0	0	0	0	0	0	0	0	0	0	0	0	0	0	0	0	-1124755	-1127375	-1131186	-1134480	-1136095	-1134825	-1131233	-1124897	-1115392	-1102421	-1085026	-1061515	-1029864	-988112	-934376	-863121	-771445	-649262	-490503	-287372	-34600	271374	642753	1076980	1585003	2168720	2818689	3527600
139	17.38	0	0	0	0	0	0	0	0	0	0	0	0	0	0	0	0	0	0	0	0	-1090124	-1094892	-1100366	-1103205	-1104726	-1104742	-1102719	-1100303	-1093951	-1082250	-1065656	-1042380	-1011184	-969839	-917845	-848989	-757862	-638973	-482472	-282149	-34474	265539	624496	1046803	1541024	2117196	2768922	3490004
140	17.50	0	0	0	0	0	0	0	0	0	0	0	0	0	0	0	0	0	0	0	0	-1098656	-1098578	-1099927	-1101589	-1102515	-1102562	-1101134	-1097072	-1090202	-1079192	-1063915	-1041423	-1010556	-967988	-910865	-836426	-740374	-618034	-463463	-268033	-23699	278871	643553	1077357	1584549	2168799	2822484	3543096
141	17.63	0	0	0	0	0	0	0	0	0	0	0	0	0	0	0	0	0	0	0	0	-1118168	-1120176	-1124081	-1127610	-1129696	-1129131	-1126324	-1121117	-1113557	-1102860	-1088116	-1066581	-1035667	-993617	-936948	-861757	-763838	-637812	-478614	-277710	-29643	274323	645294	1085670	1602052	2189408	2841243	3549746
142	17.75	0	0	0	0	0	0	0	0	0	0	0	0	0	0	0	0	0	0	0	0	-1115376	-1113400	-1112898	-1112380	-1111690	-1109541	-1106467	-1101448	-1093951	-1083646	-1068558	-1047101	-1016924	-975109	-919052	-843390	-745801	-619352	-460890	-262010	-19135	277977	642000	1075898	1591481	2189220	2854575	3579798
143	17.88	0	0	0	0	0	0	0	0	0	0	0	0	0	0	0	0	0	0	0	0	-1092241	-1091222	-1091881	-1092430	-1092288	-1090124	-1085811	-1080149	-1072761	-1062943	-1049611	-1029597	-1000455	-958264	-901266	-825133	-726634	-602648	-445080	-249980	-8846	288250	648117	1080870	1586744	2166540	2819708	3534752
144	18.00	0	0	0	0	0	0	0	0	0	0	0	0	0	0	0	0	0	0	0	0	-1111439	-1110279	-1110420	-1110749	-1110435	-1108773	-1105683	-1101134	-1094578	-1084728	-1069954	-1048136	-1017206	-974560	-917876	-842590	-745424	-621061	-464514	-267453	-26208	270574	627445	1052183	1548145	2126246	2779571	3498787
145	18.13	0	0	0	0	0	0	0	0	0	0	0	0	0	0	0	0	0	0	0	0	-1088650	-1089904	-1093057	-1096586	-1098923	-1099001	-1096555	-1090955	-1082015	-1070126	-1054347	-1033095	-1003184	-962499	-906505	-831423	-732626	-605000	-441959	-237480	14304	322584	690999	1121289	1625250	2197078	2839690	3546217
146	18.25	0	0	0	0	0	0	0	0	0	0	0	0	0	0	0	0	0	0	0	0	-1086516	-1085183	-1084979	-1084697	-1083976	-1082313	-1079584	-1075020	-1067915	-1057296	-1041565	-1019810	-988582	-946265	-889236	-814844	-716878	-592594	-435027	-235409	9520	308076	667268	1094092	1595371	2170696	2817763	3527160
147	18.38	0	0	0	0	0	0	0	0	0	0	0	0	0	0	0	0	0	0	0	0	-1083238	-1084744	-1088461	-1091881	-1094280	-1094751	-1093198	-1089104	-1081654	-1070471	-1053453	-1029048	-995938	-951096	-894349	-820961	-726524	-605126	-449378	-249463	15	308515	683831	1127092	1642534	2225702	2871122	3572065
148	18.50	0	0	0	0	0	0	0	0	0	0	0	0	0	0	0	0	0	0	0	0	-1075788	-1075757	-1077278	-1078659	-1078862	-1077200	-1073969	-1069060	-1061845	-1051242	-1035887	-1013709	-982591	-941622	-888138	-817103	-724752	-603197	-447276	-249196	-4423	297097	663912	1107157	1627963	2233137	2910255	3644842
149	18.63	0	0	0	0	0	0	0	0	0	0	0	0	0	0	0	0	0	0	0	0	-1060794	-1062300	-1065531	-1069154	-1070957	-1070816	-1068903	-1063915	-1057061	-1045501	-1029425	-1005600	-973007	-929608	-872140	-797356	-699217	-572643	-410653	-205169	50096	363160	735025	1171778	1675143	2246359	2886430	3587577
150	18.75	0	0	0	0	0	0	0	0	0	0	0	0	0	0	0	0	0	0	0	0	-1045242	-1047132	-1050569	-1052850	-1053522	-1052475	-1050241	-1045820	-1039196	-1028822	-1012622	-989234	-957317	-913995	-857972	-784763	-689574	-565888	-407864	-206939	41572	342529	704415	1133979	1638564	2220513	2875108	3595052
151	18.88	0	0	0	0	0	0	0	0	0	0	0	0	0	0	0	0	0	0	0	0	-1034259	-1037181	-1041227	-1044726	-1045976	-1045008	-1042305	-1037274	-1029947	-1019214	-1003592	-981610	-951193	-909339	-853504	-779452	-684262	-561092	-406926	-208939	39291	344982	717851	1161600	1673918	2257242	2909056	3617112
152	19.00	0	0	0	0	0	0	0	0	0	0	0	0	0	0	0	0	0	0	0	0	-1047599	-1048880	-1051770	-1054378	-1055924	-1055175	-1052160	-1046522	-1037447	-1025623	-1009130	-987013	-956775	-915041	-859765	-785512	-688346	-564284	-407734	-211762	30550	327515	690548	1124148	1636171	2225852	2889599	3616477
153	19.13	0	0	0	0	0	0	0	0	0	0	0	0	0	0	0	0	0	0	0	0	-1031948	-1033557	-1035977	-1037523	-1037586	-1035790	-1032916	-1028029	-1020986	-1010757	-995922	-973934	-942764	-899945	-844117	-771689	-679913	-561245	-410518	-215659	28031	330188	698558	1135530	1646679	2235081	2894209	3615896
154	19.25	0	0	0	0	0	0	0	0	0	0	0	0	0	0	0	0	0	0	0	0	-1022337	-1026122	-1032197	-1038147	-1042758	-1044533	-1043864	-1039533	-1031761	-1020561	-1004767	-982773	-952789	-910624	-855250	-781947	-687352	-567056	-414112	-218847	25093	329844	698505	1136886	1648132	2234987	2890828	3609910
155	19.38	0	0	0	0	0	0	0	0	0	0	0	0	0	0	0	0	0	0	0	0	-1031561	-1030844	-1031156	-1031794	-1031966	-1031561	-1030471	-1028181	-1023275	-1014897	-1000662	-978936	-946620	-901673	-842150	-764466	-664855	-539531	-381439	-185689	57078	351848	711343	1139723	1642250	2220015	2865076	3575111
156	19.50	0	0	0	0	0	0	0	0	0	0	0	0	0	0	0	0	0	0	0	0	-1026939	-1028427	-1030813	-1032332	-1031743	-1029434	-1025761	-1020105	-1012683	-1001882	-985999	-963638	-932584	-891132	-836926	-765366	-671583	-548979	-390655	-190415	55878	353496	711563	1134699	1631286	2206887	2854173	3563583
157	19.63	0	0	0	0	0	0	0	0	0	0	0	0	0	0	0	0	0	0	0	0	-1017827	-1022771	-1029852	-1035710	-1039320	-1039770	-1037414	-1032905	-1025761	-1015286	-999372	-976267	-943586	-898632	-840150	-764513	-666904	-542067	-385789	-189966	51431	347499	707410	1138604	1650005	2240358	2903853	3631192
158	19.75	0	0	0	0	0	0	0	0	0	0	0	0	0	0	0	0	0	0	0	0	-1030530	-1030669	-1033110	-1036539	-1039366	-1040278	-1038486	-1033249	-1025061	-1013259	-996822	-973990	-941858	-898418	-841846	-767464	-671994	-548687	-392398	-195681	46854	341496	700666	1128672	1636190	2225383	2888834	3613121
159	19.88	0	0	0	0	0	0	0	0	0	0	0	0	0	0	0	0	0	0	0	0	-1009691	-1009938	-1012193	-1014665	-1016488	-1016580	-1014711	-1010139	-1002445	-991230	-974191	-950771	-917836	-874797	-818427	-746763	-655403	-539820	-390930	-200980	39562	338159	706073	1141000	1655392	2246531	2908979	3627951
160	20.00	0	0	0	0	0	0	0	0	0	0	0	0	0	0	0	0	0	0	0	0	-995692	-997159	-1000697	-1004898	-1008265	-1009578	-1007756	-1002890	-994811	-983026	-966559	-944455	-915029	-874822	-820573	-748005	-651015	-523673	-360587	-154821	98348	402880	768842	1197487	1698624	2273950	2921011	3635111
161	20.13	0	0	0	0	0	0	0	0	0	0	0	0	0	0	0	0	0	0	0	0	-1012127	-1013255	-1016576	-1020530	-1023048	-1022554	-1019063	-1012884	-1004543	-993591	-978793	-957878	-928236	-887055	-831849	-758524	-661997	-537621	-377887	-174840	76970	382552	749240	1180619	1683594	2263678	2916794	3630971
162	20.25	0	0	0	0	0	0	0	0	0	0	0	0	0	0	0	0	0	0	0	0	-988616	-992781	-998365	-1003116	-1005846	-1005599	-1002560	-997146	-988786	-976893	-959663	-935970	-903268	-859785	-803359	-730259	-635271	-514923	-362630	-171188	65402	352743	704607	1129031	1630443	2215120	2875472	3601398
163	20.38	0	0	0	0	0	0	0	0	0	0	0	0	0	0	0	0	0	0	0	0	-985733	-989672	-993458	-995227	-994842	-993304	-991596	-988518	-982410	-971500	-955129	-931587	-900613	-859591	-806137	-734772	-642081	-521894	-367532	-172779	67810	362470	720509	1148466	1656419	2247863	2917610	3651275
164	20.50	0	0	0	0	0	0	0	0	0	0	0	0	0	0	0	0	0	0	0	0	-982491	-983703	-986418	-989501	-991526	-991465	-988719	-983166	-974637	-962427	-945767	-923248	-892568	-851596	-797323	-726330	-634305	-515068	-362451	-167956	74920	374861	738233	1171571	1679016	2260430	2907683	3613488
165	20.63	0	0	0	0	0	0	0	0	0	0	0	0	0	0	0	0	0	0	0	0	-994778	-993720	-993950	-994901	-995699	-995898	-994426	-991020	-984915	-974929	-959619	-937591	-905730	-862564	-805714	-732190	-637481	-517062	-363264	-167650	77190	379509	744692	1178091	1684738	2262332	2909263	3615421
166	20.75	0	0	0	0	0	0	0	0	0	0	0	0	0	0	0	0	0	0	0	0	-972761	-972454	-973482	-974693	-975414	-974509	-972454	-967701	-960033	-948302	-931234	-908109	-876273	-834945	-781288	-710394	-618553	-498219	-343688	-147415	94341	390628	748778	1176594	1685042	2272281	2935858	3657095
167	20.88	0	0	0	0	0	0	0	0	0	0	0	0	0	0	0	0	0	0	0	0	-976865	-977277	-979692	-982839	-984780	-984719	-982152	-976789	-969409	-959156	-944365	-923463	-893332	-852459	-797300	-724921	-629882	-506531	-350206	-152627	91539	391063	754410	1185843	1693001	2274264	2919442	3625524
168	21.00	0	0	0	0	0	0	0	0	0	0	0	0	0	0	0	0	0	0	0	0	-976697	-976407	-977950	-980028	-980883	-980028	-976682	-970830	-962502	-951425	-936023	-914723	-885173	-844025	-788682	-716120	-621463	-499579	-344262	-147539	97605	397802	756779	1184727	1687867	2269039	2926394	3650322
169	21.13	0	0	0	0	0	0	0	0	0	0	0	0	0	0	0	0	0	0	0	0	-982418	-983319	-985625	-987641	-989016	-988573	-986709	-982280	-975590	-965051	-949014	-926287	-895128	-853080	-799393	-728508	-636087	-516173	-360519	-162588	84661	389096	757574	1193301	1704664	2289584	2944733	3658778
170	21.25	0	0	0	0	0	0	0	0	0	0	0	0	0	0	0	0	0	0	0	0	-967900	-966543	-966878	-968190	-969303	-970096	-969562	-965704	-958004	-945258	-927129	-902382	-869692	-826649	-769441	-695217	-599601	-476890	-320620	-123472	122588	421237	781623	1209296	1711741	2290606	2944289	3663003
171	21.38	0	0	0	0	0	0	0	0	0	0	0	0	0	0	0	0	0	0	0	0	-968316	-971252	-975665	-980032	-982832	-983364	-981554	-976821	-969152	-957345	-939892	-915211	-881705	-837654	-781414	-709061	-617612	-498742	-347523	-155083	85941	384073	745945	1180110	1690707	2278891	2934269	3647683
172	21.50	0	0	0	0	0	0	0	0	0	0	0	0	0	0	0	0	0	0	0	0	-968392	-970172	-972850	-975193	-976152	-975056	-972150	-967676	-960997	-951562	-937016	-915835	-885174	-842158	-785690	-711587	-616912	-496475	-344845	-153653	86336	381516	746174	1183078	1698786	2298641	2973740	3709522
173	21.63	0	0	0	0	0	0	0	0	0	0	0	0	0	0	0	0	0	0	0	0	-966961	-968620	-971800	-975132	-977202	-976806	-974341	-969365	-961788	-950649	-935555	-914054	-884535	-844912	-792416	-722817	-631611	-513106	-358190	-159177	89623	397022	765787	1200865	1708555	2288781	2941680	3659612
174	21.75	0	0	0	0	0	0	0	0	0	0	0	0	0	0	0	0	0	0	0	0	-954746	-955642	-957708	-960428	-962175	-962783	-961582	-957967	-950948	-940526	-924407	-901633	-869578	-826735	-771010	-699211	-606507	-486442	-330265	-129317	122829	431963	805375	1243871	1755229	2338645	2991094	3705574
175	21.88	0	0	0	0	0	0	0	0	0	0	0	0	0	0	0	0	0	0	0	0	-954715	-953500	-954275	-955870	-957192	-957207	-955004	-950173	-942394	-930499	-913939	-890892	-860189	-818197	-763247	-688880	-591497	-465264	-305882	-107789	136898	437250	799237	1229636	1731696	2302229	2939456	3642025
176	22.00	0	0	0	0	0	0	0	0	0	0	0	0	0	0	0	0	0	0	0	0	-969665	-969832	-971488	-973037	-973706	-973493	-971260	-966672	-958848	-947059	-930909	-908242	-878359	-837522	-783073	-710484	-614894	-490256	-332028	-132765	113137	414081	779502	1218591	1735677	2334816	3003081	3731447
177	22.13	0	0	0	0	0	0	0	0	0	0	0	0	0	0	0	0	0	0	0	0	-958644	-960611	-964182	-967299	-968600	-967934	-965060	-959930	-952744	-942818	-928051	-905930	-874247	-830490	-772919	-698508	-603111	-478997	-320476	-119847	129969	435451	805737	1246863	1762748	2352741	3005783	3714883
178	22.25	0	0	0	0	0	0	0	0	0	0	0	0	0	0	0	0	0	0	0	0	-949233	-949385	-951563	-954030	-956299	-957691	-957752	-954892	-948870	-938324	-922150	-898683	-867862	-826360	-772253	-701020	-607317	-484519	-327375	-126565	119998	421501	783631	1214166	1719218	2306609	2967836	3695667
179	22.38	0	0	0	0	0	0	0	0	0	0	0	0	0	0	0	0	0	0	0	0	-951795	-952990	-955621	-957920	-958722	-957497	-954275	-949208	-941495	-931013	-915919	-894155	-863406	-820845	-764476	-690531	-595639	-473281	-316740	-118849	128196	429419	792003	1220666	1716755	2287545	2929496	3636181
180	22.50	0	0	0	0	0	0	0	0	0	0	0	0	0	0	0	0	0	0	0	0	-947212	-950948	-955485	-958843	-959614	-958011	-954396	-948573	-939801	-927686	-910731	-887303	-855935	-813903	-758214	-685948	-591283	-468456	-313504	-117760	124385	422265	784123	1216491	1723349	2308946	2961152	3678605
181	22.63	0	0	0	0	0	0	0	0	0	0	0	0	0	0	0	0	0	0	0	0	-938470	-942327	-947953	-952899	-956181	-957134	-955107	-949813	-941026	-927580	-909310	-885019	-853409	-811468	-756308	-682742	-586912	-462618	-305124	-107990	135305	431824	790672	1217505	1713775	2288074	2930706	3636438
182	22.75	0	0	0	0	0	0	0	0	0	0	0	0	0	0	0	0	0	0	0	0	-965051	-963811	-964038	-964900	-965883	-965429	-963524	-959472	-952335	-940723	-923909	-900881	-870126	-829619	-777015	-707220	-615848	-494780	-339813	-139711	111118	420026	794222	1240648	1756174	2341510	2989323	3688802
183	22.88	0	0	0	0	0	0	0	0	0	0	0	0	0	0	0	0	0	0	0	0	-959683	-960031	-961029	-960621	-958549	-954890	-950430	-945682	-939195	-930123	-916152	-895090	-865227	-824024	-768790	-694655	-596993	-471389	-309496	-105917	144534	449661	817069	1249524	1753029	2327630	2974415	3679700
184	23.00	0	0	0	0	0	0	0	0	0	0	0	0	0	0	0	0	0	0	0	0	-965592	-966422	-968204	-968748	-967841	-965169	-961212	-956124	-949555	-939106	-923356	-900403	-869251	-827363	-773394	-702347	-608649	-486865	-330259	-132097	113388	417388	784282	1224094	1739349	2326722	2985354	3699420
185	23.13	0	0	0	0	0	0	0	0	0	0	0	0	0	0	0	0	0	0	0	0	-957130	-957703	-959575	-961521	-962231	-961144	-957628	-951817	-943215	-931413	-915038	-892748	-862051	-820216	-764028	-690787	-595301	-472664	-317775	-121610	122999	422875	790817	1234791	1756036	2356680	3027395	3750827
186	23.25	0	0	0	0	0	0	0	0	0	0	0	0	0	0	0	0	0	0	0	0	-936230	-936939	-939562	-941749	-942608	-941191	-937693	-932310	-924967	-914563	-898882	-875738	-842958	-798916	-741379	-667708	-572672	-450753	-296988	-100629	142305	441525	804389	1238316	1749109	2336332	2997120	3716802
187	23.38	0	0	0	0	0	0	0	0	0	0	0	0	0	0	0	0	0	0	0	0	-958772	-957777	-958319	-959465	-960385	-959857	-957264	-952228	-944674	-933893	-918800	-897676	-867143	-825167	-768564	-693597	-595440	-468303	-306261	-103615	146617	448310	814130	1244678	1751386	2333211	2985872	3702086
188	23.50	0	0	0	0	0	0	0	0	0	0	0	0	0	0	0	0	0	0	0	0	-939512	-937269	-936427	-936050	-935689	-934681	-932860	-928841	-922460	-912181	-896468	-873396	-841038	-798491	-743136	-672671	-581135	-462148	-307822	-108602	139877	443169	809523	1243121	1748659	2330306	2982600	3695801
189	23.63	0	0	0	0	0	0	0	0	0	0	0	0	0	0	0	0	0	0	0	0	-948953	-954143	-960882	-966644	-969517	-968855	-965245	-958897	-949780	-937535	-920611	-896947	-865205	-822285	-767391	-695543	-603250	-482886	-325980	-124772	128999	438236	812251	1250488	1760362	2342656	2990692	3697412
190	23.75	0	0	0	0	0	0	0	0	0	0	0	0	0	0	0	0	0	0	0	0	-951886	-954474	-958114	-961198	-962402	-961574	-958912	-954745	-947524	-936767	-920189	-896872	-864558	-821729	-765240	-690488	-593276	-466729	-306348	-103003	145637	446209	805873	1233293	1736277	2322182	2982312	3702030
191	23.88	0	0	0	0	0	0	0	0	0	0	0	0	0	0	0	0	0	0	0	0	-936782	-938828	-942514	-945733	-947163	-946350	-943236	-937610	-929531	-918911	-904017	-882415	-852072	-808957	-749985	-672435	-571688	-445021	-286310	-86846	159206	460425	824301	1254685	1761896	2349937	3015829	3744830
192	24.00	0	0	0	0	0	0	0	0	0	0	0	0	0	0	0	0	0	0	0	0	-929974	-932464	-936454	-940099	-941659	-940969	-938479	-933649	-926958	-917163	-902492	-880725	-850228	-807850	-752886	-680041	-586405	-464687	-307671	-108412	141654	446085	816206	1251416	1758001	2341406	2993156	3708270
193	24.13	0	0	0	0	0	0	0	0	0	0	0	0	0	0	0	0	0	0	0	0	-944285	-942874	-942844	-943220	-943415	-942994	-942064	-939289	-934204	-925383	-910697	-887401	-854323	-808900	-750441	-676486	-582460	-463096	-309411	-112117	135039	443745	814991	1259306	1774727	2357052	3002411	3701790
194	24.25	0	0	0	0	0	0	0	0	0	0	0	0	0	0	0	0	0	0	0	0	-932464	-932164	-932509	-932419	-931024	-928503	-924588	-919458	-911402	-900077	-883755	-862169	-833127	-794544	-741966	-670651	-575439	-451411	-294665	-95121	155920	465197	846148	1300199	1826180	2421166	3073801	3777260
195	24.38	0	0	0	0	0	0	0	0	0	0	0	0	0	0	0	0	0	0	0	0	-916398	-918363	-920823	-922878	-923313	-922038	-919518	-914778	-907787	-897256	-881895	-860459	-829572	-787539	-730595	-655125	-558278	-432794	-273528	-71074	180717	491598	864839	1306920	1820165	2405475	3055335	3764449
196	24.50	0	0	0	0	0	0	0	0	0	0	0	0	0	0	0	0	0	0	0	0	-913090	-916480	-920841	-923499	-923201	-919945	-914255	-906563	-897154	-885057	-869316	-847690	-818283	-778676	-725567	-655985	-564210	-447046	-293799	-99152	147302	454678	828722	1272931	1792353	2383282	3043689	3759369
197	24.63	0	0	0	0	0	0	0	0	0	0	0	0	0	0	0	0	0	0	0	0	-897065	-899380	-903890	-908639	-912238	-913135	-911283	-906414	-898902	-888029	-872810	-850602	-818641	-775121	-717980	-644336	-550739	-429259	-273637	-73121	183774	499931	883130	1331566	1844789	2425637	3069436	3773408
198	24.75	0	0	0	0	0	0	0	0	0	0	0	0	0	0	0	0	0	0	0	0	-888417	-889209	-890807	-892106	-891793	-889523	-885206	-879815	-872631	-862490	-847765	-825945	-794790	-752554	-698311	-627684	-535341	-413891	-254983	-47791	211015	525141	903188	1346560	1858395	2447651	3105071	3822828
199	24.88	0	0	0	0	0	0	0	0	0	0	0	0	0	0	0	0	0	0	0	0	-892082	-895376	-899593	-902276	-902395	-899176	-893230	-885183	-875213	-863455	-848761	-828092	-799494	-759169	-704850	-632424	-538391	-415148	-256066	-50742	207142	525247	905867	1354367	1866739	2444473	3081621	3775772
200	25.00	0	0	0	0	0	0	0	0	0	0	0	0	0	0	0	0	0	0	0	0	-884467	-887537	-891546	-895093	-896657	-896196	-893826	-889027	-881725	-870862	-855065	-833054	-801670	-758871	-701020	-625495	-527899	-406341	-252147	-59251	185086	487455	859998	1302433	1818456	2403625	3058091	3771450
201	25.13	0	0	0	0	0	0	0	0	0	0	0	0	0	0	0	0	0	0	0	0	-826755	-827812	-830951	-834730	-837557	-838003	-835742	-830758	-823244	-812844	-798011	-777419	-748347	-707357	-651400	-576220	-477086	-349728	-190679	9998	260235	571757	952997	1407335	1934383	2529053	3179278	3881116
202	25.25	0	0	0	0	0	0	0	0	0	0	0	0	0	0	0	0	0	0	0	0	57638	48101	37582	27896	20293	14759	10786	7781	4894	1934	-624	-3020	-4522	-4894	-3823	-2514	-862	208	267	-297	-937	-2008	-2811	-3436	-3674	-4552	-5385	-5832
[truncated: 208 more columns]
