# Supplementary material for: Imaging Internal Defects with Synthetic and Experimental Data
Source: Hindawi journal article supplement (doi:10.1155/2019/6956809), 2019-07-14
Supplement: f1 [file 6956809.f1.zip › 6956809.f1/data of fig9b.CSV]

Scan	Dist.(cm)	Scan Data Values Scan Values
0	0.00	0	0	0	0	0	0	0	0	0	0	0	0	0	0	0	0	0	0	0	0	-1107058	-1104728	-1103385	-1101919	-1099666	-1095840	-1091349	-1085563	-1078341	-1069237	-1057402	-1041678	-1019782	-989707	-948214	-891291	-816822	-718915	-593494	-432861	-232601	12205	308814	658797	1073882	1564855	2136021	2784279
1	0.13	0	0	0	0	0	0	0	0	0	0	0	0	0	0	0	0	0	0	0	0	-1117444	-1118210	-1121045	-1123956	-1125963	-1125795	-1123006	-1117628	-1110365	-1101079	-1089817	-1075030	-1054590	-1025737	-986128	-933846	-864848	-777799	-665376	-522935	-343107	-117096	162053	500258	904825	1383983	1938239	2566887
2	0.25	0	0	0	0	0	0	0	0	0	0	0	0	0	0	0	0	0	0	0	0	-1160757	-1161630	-1163726	-1164445	-1163313	-1159656	-1154117	-1146819	-1138404	-1128566	-1116784	-1102433	-1083445	-1057419	-1021739	-973298	-908654	-824304	-715121	-574572	-394426	-167247	113971	453332	853114	1321043	1856921	2464680
3	0.38	0	0	0	0	0	0	0	0	0	0	0	0	0	0	0	0	0	0	0	0	-1133921	-1133783	-1135068	-1136109	-1136460	-1135680	-1133676	-1129805	-1124006	-1114979	-1102448	-1086398	-1064365	-1035081	-995193	-941886	-871107	-780208	-665318	-519751	-338289	-110468	172449	519644	935950	1427426	1986607	2617607
4	0.50	0	0	0	0	0	0	0	0	0	0	0	0	0	0	0	0	0	0	0	0	-1167765	-1162930	-1159732	-1157345	-1155203	-1152740	-1149282	-1144187	-1137226	-1127678	-1115499	-1098929	-1077187	-1048055	-1009529	-958839	-892237	-806066	-690946	-541692	-349076	-107178	193212	556380	989838	1489806	2059865	2689457
5	0.63	0	0	0	0	0	0	0	0	0	0	0	0	0	0	0	0	0	0	0	0	-1166602	-1164858	-1164307	-1164108	-1163496	-1161783	-1158722	-1153490	-1145166	-1134242	-1119753	-1101790	-1078534	-1048576	-1009254	-956728	-886851	-796579	-678277	-527707	-338748	-105250	185332	536107	954999	1447745	2013260	2645576
6	0.75	0	0	0	0	0	0	0	0	0	0	0	0	0	0	0	0	0	0	0	0	-1180663	-1177511	-1176624	-1176501	-1175782	-1173518	-1169111	-1162655	-1154683	-1144707	-1132207	-1115606	-1093145	-1063096	-1023024	-969855	-900300	-810136	-693578	-544660	-356573	-121239	170996	527416	951709	1446399	2006681	2627858
7	0.88	0	0	0	0	0	0	0	0	0	0	0	0	0	0	0	0	0	0	0	0	-1184090	-1184932	-1186967	-1188206	-1187518	-1184396	-1179301	-1172738	-1164307	-1154301	-1141204	-1123731	-1100168	-1068542	-1027094	-973267	-905533	-818765	-708541	-567457	-385613	-157348	129134	476237	890355	1370800	1917740	2534649
8	1.00	0	0	0	0	0	0	0	0	0	0	0	0	0	0	0	0	0	0	0	0	-1195397	-1194617	-1194479	-1193454	-1190455	-1185376	-1178888	-1171406	-1163328	-1153505	-1141586	-1125643	-1103993	-1074418	-1034254	-981224	-911393	-821748	-708587	-564703	-384894	-158832	123182	470086	886102	1378068	1937340	2563459
9	1.13	0	0	0	0	0	0	0	0	0	0	0	0	0	0	0	0	0	0	0	0	-1204424	-1203751	-1204302	-1203858	-1202129	-1198763	-1194464	-1188696	-1181382	-1171575	-1158386	-1140500	-1117014	-1086031	-1045454	-992179	-923159	-834999	-722373	-579193	-397410	-169221	118286	473743	899979	1402915	1975529	2606009
10	1.25	0	0	0	0	0	0	0	0	0	0	0	0	0	0	0	0	0	0	0	0	-1220367	-1218562	-1217873	-1217307	-1215915	-1213895	-1210407	-1204715	-1196851	-1185299	-1170886	-1151072	-1125505	-1090101	-1045209	-987435	-916656	-827272	-712749	-556824	-355609	-102925	200204	555125	961471	1438427	1986270	2613889
11	1.38	0	0	0	0	0	0	0	0	0	0	0	0	0	0	0	0	0	0	0	0	-1212717	-1210254	-1209290	-1208800	-1207760	-1205511	-1201839	-1195749	-1187395	-1175522	-1160054	-1140102	-1114474	-1081930	-1039732	-985171	-915080	-825222	-712994	-569569	-389469	-161479	125018	480307	909955	1418170	2000316	2648972
12	1.50	0	0	0	0	0	0	0	0	0	0	0	0	0	0	0	0	0	0	0	0	-1204593	-1203032	-1203277	-1203981	-1203338	-1200676	-1195596	-1188833	-1180311	-1169953	-1156030	-1137562	-1112454	-1079467	-1036198	-980275	-909037	-819912	-706231	-561812	-378376	-144542	147372	506577	935261	1437662	2009802	2645423
13	1.63	0	0	0	0	0	0	0	0	0	0	0	0	0	0	0	0	0	0	0	0	-1196744	-1197310	-1199574	-1201640	-1202129	-1200416	-1196377	-1190409	-1182132	-1171253	-1157468	-1139322	-1115453	-1083827	-1041797	-985860	-912785	-819117	-700386	-551897	-367314	-137748	148214	499692	922241	1417665	1979645	2604326
14	1.75	0	0	0	0	0	0	0	0	0	0	0	0	0	0	0	0	0	0	0	0	-1216221	-1215165	-1215487	-1215395	-1214033	-1210453	-1204929	-1197279	-1187870	-1176517	-1162502	-1144417	-1119860	-1087347	-1044001	-987634	-915004	-821886	-703691	-553121	-366121	-134658	148458	492302	909144	1403298	1975835	2620101
15	1.88	0	0	0	0	0	0	0	0	0	0	0	0	0	0	0	0	0	0	0	0	-1222402	-1221821	-1222923	-1224514	-1224544	-1222066	-1216328	-1207377	-1195474	-1181122	-1164506	-1144983	-1120747	-1089519	-1048040	-993005	-922532	-830561	-714004	-565009	-377887	-145964	139814	485448	900285	1387171	1949289	2583579
16	2.00	0	0	0	0	0	0	0	0	0	0	0	0	0	0	0	0	0	0	0	0	-1242232	-1244481	-1247709	-1249361	-1248841	-1245322	-1239768	-1231827	-1221790	-1209259	-1193714	-1174359	-1149037	-1116111	-1073592	-1018006	-947731	-859265	-745706	-602082	-417637	-183358	109045	466873	898556	1404231	1978834	2617393
17	2.13	0	0	0	0	0	0	0	0	0	0	0	0	0	0	0	0	0	0	0	0	-1248918	-1249652	-1251427	-1251932	-1250081	-1245674	-1239386	-1231843	-1223167	-1212121	-1198105	-1178628	-1153184	-1119431	-1076361	-1020469	-949307	-857704	-740336	-590056	-400990	-162106	130006	489242	916794	1420312	1994425	2633121
18	2.25	0	0	0	0	0	0	0	0	0	0	0	0	0	0	0	0	0	0	0	0	-1230573	-1228752	-1227910	-1226977	-1224912	-1221086	-1215624	-1208066	-1197815	-1184503	-1167903	-1146834	-1119982	-1085969	-1041690	-984544	-911102	-817648	-699254	-549740	-361882	-126258	167308	528472	963445	1473266	2051067	2691263
19	2.38	0	0	0	0	0	0	0	0	0	0	0	0	0	0	0	0	0	0	0	0	-1234092	-1234061	-1235147	-1235530	-1234015	-1230328	-1224422	-1216129	-1206750	-1195137	-1180740	-1162180	-1136920	-1103550	-1058949	-1001726	-928545	-833790	-712979	-558002	-362449	-118454	184429	552738	993602	1505642	2086319	2730125
20	2.50	0	0	0	0	0	0	0	0	0	0	0	0	0	0	0	0	0	0	0	0	-1207423	-1210652	-1214385	-1216741	-1216481	-1213084	-1208005	-1200385	-1190639	-1177725	-1161017	-1139827	-1112317	-1078013	-1033841	-976618	-902335	-807060	-687136	-535036	-345848	-108892	188362	554712	994443	1508243	2095514	2744339
21	2.63	0	0	0	0	0	0	0	0	0	0	0	0	0	0	0	0	0	0	0	0	-1206658	-1206077	-1206704	-1207240	-1206398	-1203598	-1198978	-1192230	-1183188	-1170932	-1154867	-1133462	-1105768	-1069950	-1023713	-964485	-888733	-792555	-671637	-518802	-327365	-87640	207533	567825	998100	1503056	2082800	2731640
22	2.75	0	0	0	0	0	0	0	0	0	0	0	0	0	0	0	0	0	0	0	0	-1196820	-1195719	-1194999	-1193072	-1189797	-1184840	-1178751	-1171376	-1161966	-1150292	-1135068	-1115698	-1090407	-1056761	-1012604	-953836	-877503	-777898	-648794	-483061	-272682	-11521	305960	683648	1125995	1633460	2203871	2830602
23	2.88	0	0	0	0	0	0	0	0	0	0	0	0	0	0	0	0	0	0	0	0	-1202175	-1199605	-1197861	-1196269	-1193837	-1190562	-1185758	-1178475	-1168545	-1155586	-1138939	-1117809	-1090621	-1055170	-1008978	-949583	-873402	-776398	-652512	-493373	-294071	-43483	263823	639155	1088081	1616752	2213174	2869465
24	3.00	0	0	0	0	0	0	0	0	0	0	0	0	0	0	0	0	0	0	0	0	-1191863	-1193026	-1194877	-1195504	-1193959	-1190027	-1184366	-1176455	-1166709	-1153566	-1137333	-1116035	-1088219	-1052079	-1005475	-945283	-869118	-771028	-644907	-483673	-277027	-18788	297820	681445	1132620	1653565	2239582	2885485
25	3.13	0	0	0	0	0	0	0	0	0	0	0	0	0	0	0	0	0	0	0	0	-1195122	-1195061	-1195443	-1194816	-1192643	-1188925	-1184228	-1177481	-1168056	-1155066	-1137394	-1114489	-1085159	-1048224	-1000686	-940555	-862998	-764740	-639568	-480429	-281296	-34456	270203	644831	1095547	1626223	2229668	2894405
26	3.25	0	0	0	0	0	0	0	0	0	0	0	0	0	0	0	0	0	0	0	0	-1179026	-1179607	-1180954	-1181734	-1180632	-1177511	-1172753	-1165409	-1155938	-1143346	-1127020	-1105845	-1077906	-1042455	-996034	-935567	-858331	-758099	-630479	-468954	-269040	-19247	287737	660284	1107145	1630064	2224328	2876656
27	3.38	0	0	0	0	0	0	0	0	0	0	0	0	0	0	0	0	0	0	0	0	-1188038	-1188313	-1189553	-1189843	-1188619	-1184901	-1179041	-1170733	-1160038	-1146299	-1130004	-1108889	-1081226	-1044230	-995988	-932798	-853053	-753035	-625124	-464425	-260548	-5370	311391	700004	1158967	1693866	2293439	2944682
28	3.50	0	0	0	0	0	0	0	0	0	0	0	0	0	0	0	0	0	0	0	0	-1190578	-1191542	-1194433	-1196728	-1197080	-1194648	-1189889	-1181857	-1171391	-1157835	-1140439	-1117473	-1088265	-1049784	-1000517	-937602	-857092	-756386	-629668	-470254	-270555	-20410	290246	670903	1129881	1664030	2264476	2918992
29	3.63	0	0	0	0	0	0	0	0	0	0	0	0	0	0	0	0	0	0	0	0	-1179424	-1179286	-1180158	-1180418	-1179225	-1175492	-1169448	-1160941	-1149695	-1136063	-1119232	-1098393	-1071235	-1035295	-988308	-926250	-846887	-745599	-616051	-453898	-247375	8889	324443	707409	1163068	1691755	2289400	2949073
30	3.75	0	0	0	0	0	0	0	0	0	0	0	0	0	0	0	0	0	0	0	0	-1168882	-1167566	-1167321	-1167015	-1166051	-1163603	-1159610	-1152908	-1142565	-1129147	-1112072	-1090651	-1062774	-1027232	-981009	-921461	-845770	-749638	-625966	-467087	-263915	-4850	314314	702896	1160467	1688465	2278919	2929963
31	3.88	0	0	0	0	0	0	0	0	0	0	0	0	0	0	0	0	0	0	0	0	-1196912	-1198503	-1200844	-1202252	-1201196	-1197371	-1190807	-1181352	-1169264	-1153811	-1135313	-1112454	-1084302	-1048468	-1001802	-940601	-861896	-761022	-634136	-473666	-272024	-18421	299962	689737	1155249	1697186	2304501	2968229
32	4.00	0	0	0	0	0	0	0	0	0	0	0	0	0	0	0	0	0	0	0	0	-1185972	-1186447	-1187961	-1188635	-1187732	-1184580	-1179026	-1170856	-1159916	-1145885	-1128627	-1106870	-1079008	-1043190	-996616	-935935	-857107	-757502	-629041	-467470	-263700	-8705	307000	691451	1147354	1676133	2270060	2919314
33	4.13	0	0	0	0	0	0	0	0	0	0	0	0	0	0	0	0	0	0	0	0	-1158248	-1159487	-1161951	-1163343	-1163160	-1160451	-1154959	-1146421	-1135129	-1120778	-1103488	-1081716	-1053716	-1017700	-970605	-910184	-832489	-733190	-605142	-441673	-234722	22598	336040	713636	1160252	1681687	2275691	2934981
34	4.25	0	0	0	0	0	0	0	0	0	0	0	0	0	0	0	0	0	0	0	0	-1186921	-1184886	-1184197	-1182667	-1179730	-1175109	-1168545	-1159487	-1148502	-1134655	-1117243	-1095318	-1068328	-1033168	-988002	-927627	-848356	-745063	-613159	-446003	-239847	13617	322071	697097	1143728	1669661	2269663	2932900
35	4.38	0	0	0	0	0	0	0	0	0	0	0	0	0	0	0	0	0	0	0	0	-1180082	-1176716	-1174268	-1171850	-1169004	-1165363	-1160681	-1154331	-1145671	-1133385	-1116601	-1094247	-1064626	-1026497	-977276	-915218	-835901	-736021	-608829	-446325	-243305	8246	316272	689523	1136353	1661950	2260176	2919344
36	4.50	0	0	0	0	0	0	0	0	0	0	0	0	0	0	0	0	0	0	0	0	-1164644	-1164384	-1165317	-1165822	-1164200	-1160084	-1153505	-1144019	-1132666	-1119095	-1101943	-1080507	-1051957	-1014624	-965403	-902947	-823875	-724959	-600261	-442607	-242525	8598	320296	702039	1153474	1677739	2266174	2906247
37	4.63	0	0	0	0	0	0	0	0	0	0	0	0	0	0	0	0	0	0	0	0	-1172018	-1173946	-1176777	-1178337	-1177159	-1172891	-1166067	-1156932	-1145885	-1132605	-1115897	-1094706	-1066186	-1029389	-981254	-919166	-840292	-740274	-613312	-452567	-250970	-703	309525	687534	1138924	1661965	2248869	2890442
38	4.75	0	0	0	0	0	0	0	0	0	0	0	0	0	0	0	0	0	0	0	0	-1171758	-1172003	-1173824	-1175277	-1174405	-1170045	-1162211	-1151302	-1137960	-1122660	-1105003	-1083904	-1056975	-1022290	-976633	-916105	-838518	-737306	-608921	-445315	-240719	12515	323723	697954	1142458	1660557	2244188	2887565
39	4.88	0	0	0	0	0	0	0	0	0	0	0	0	0	0	0	0	0	0	0	0	-1176119	-1175553	-1175966	-1176287	-1174619	-1170228	-1163282	-1154714	-1143942	-1131228	-1115683	-1095073	-1067058	-1030598	-982754	-920267	-841914	-741575	-613695	-452521	-250496	489	310427	686448	1133508	1659853	2255755	2918533
40	5.00	0	0	0	0	0	0	0	0	0	0	0	0	0	0	0	0	0	0	0	0	-1173059	-1175293	-1178200	-1179837	-1178720	-1174497	-1168453	-1159549	-1148379	-1134242	-1116279	-1093819	-1064748	-1028012	-981530	-921124	-843842	-744742	-616816	-453378	-245921	12561	330670	714310	1167352	1692030	2285131	2938730
41	5.13	0	0	0	0	0	0	0	0	0	0	0	0	0	0	0	0	0	0	0	0	-1175981	-1172829	-1169983	-1167413	-1163710	-1159044	-1153276	-1145319	-1135252	-1122078	-1105202	-1083124	-1053655	-1016583	-968693	-907323	-829735	-730115	-603704	-443173	-241760	11368	322561	700662	1147767	1662041	2242688	2883021
42	5.25	0	0	0	0	0	0	0	0	0	0	0	0	0	0	0	0	0	0	0	0	-1169065	-1167643	-1167153	-1166541	-1164491	-1160360	-1153933	-1144876	-1133247	-1118758	-1100795	-1079191	-1051330	-1015190	-967974	-905885	-825298	-722541	-591525	-426725	-221273	30508	338427	707623	1143606	1653213	2231993	2872326
43	5.38	0	0	0	0	0	0	0	0	0	0	0	0	0	0	0	0	0	0	0	0	-1163848	-1162043	-1161369	-1160283	-1157973	-1153597	-1147385	-1138954	-1128260	-1114979	-1098302	-1077524	-1050534	-1015848	-971034	-911944	-834509	-734001	-603275	-437466	-229994	25230	333607	702360	1135940	1638540	2212898	2854853
44	5.50	0	0	0	0	0	0	0	0	0	0	0	0	0	0	0	0	0	0	0	0	-1178322	-1176134	-1174864	-1173258	-1170534	-1166250	-1160008	-1151271	-1140377	-1126592	-1110175	-1089244	-1062055	-1025839	-978623	-917513	-838762	-738760	-611583	-449507	-247360	3993	315186	694939	1148058	1671726	2262670	2906523
45	5.63	0	0	0	0	0	0	0	0	0	0	0	0	0	0	0	0	0	0	0	0	-1159090	-1155953	-1153964	-1151730	-1149267	-1147171	-1144065	-1138648	-1130249	-1117534	-1100903	-1079253	-1052431	-1017776	-972242	-913749	-836192	-736342	-607559	-446600	-245983	137	298692	664660	1101530	1614167	2198761	2844602
46	5.75	0	0	0	0	0	0	0	0	0	0	0	0	0	0	0	0	0	0	0	0	-1170228	-1169555	-1169830	-1169096	-1166602	-1161951	-1155173	-1145870	-1134793	-1121543	-1105845	-1086122	-1060143	-1025717	-979586	-920191	-844209	-747833	-627618	-474998	-282780	-42075	260059	634105	1085128	1617594	2222293	2886234
47	5.88	0	0	0	0	0	0	0	0	0	0	0	0	0	0	0	0	0	0	0	0	-1157483	-1154316	-1152908	-1152006	-1151026	-1148808	-1144769	-1138526	-1128826	-1115499	-1098286	-1075779	-1046923	-1009912	-962802	-903131	-827440	-730941	-607927	-450012	-252240	-6961	294928	660346	1096068	1611856	2199557	2851441
48	6.00	0	0	0	0	0	0	0	0	0	0	0	0	0	0	0	0	0	0	0	0	-1155877	-1154867	-1155662	-1157055	-1157713	-1156259	-1152174	-1145319	-1135466	-1122201	-1105386	-1083093	-1053426	-1014486	-964057	-899489	-819392	-718456	-592473	-433656	-233620	17059	324993	698780	1142672	1659196	2237761	2880007
49	6.13	0	0	0	0	0	0	0	0	0	0	0	0	0	0	0	0	0	0	0	0	-1158003	-1156963	-1156948	-1156351	-1153933	-1149175	-1142428	-1133202	-1121543	-1106579	-1088418	-1065895	-1037314	-1001083	-954050	-893568	-817832	-720965	-600797	-444887	-246212	4115	316915	694083	1142397	1656472	2236782	2876901
50	6.25	0	0	0	0	0	0	0	0	0	0	0	0	0	0	0	0	0	0	0	0	-1135787	-1134273	-1134211	-1133844	-1132498	-1129178	-1123700	-1116035	-1105661	-1091845	-1073974	-1050871	-1020714	-982570	-934757	-874657	-798431	-701916	-576377	-413552	-207992	48410	362525	738178	1177343	1687287	2262976	2897006
51	6.38	0	0	0	0	0	0	0	0	0	0	0	0	0	0	0	0	0	0	0	0	-1140898	-1138297	-1136751	-1134777	-1131167	-1124848	-1116310	-1105890	-1094461	-1081012	-1065666	-1046250	-1020607	-986839	-941152	-880624	-802103	-700983	-574373	-413154	-213837	35206	340370	712412	1155525	1671069	2252434	2894833
52	6.50	0	0	0	0	0	0	0	0	0	0	0	0	0	0	0	0	0	0	0	0	-1141158	-1137577	-1134028	-1129300	-1123379	-1116845	-1109348	-1100826	-1089948	-1075672	-1057756	-1035631	-1009070	-975593	-932094	-874871	-799762	-702972	-579177	-423130	-227316	18253	322668	695138	1137960	1654131	2240577	2889371
53	6.63	0	0	0	0	0	0	0	0	0	0	0	0	0	0	0	0	0	0	0	0	-1150476	-1147920	-1145794	-1143070	-1138786	-1133140	-1126301	-1118146	-1107665	-1094293	-1077141	-1055277	-1027262	-992194	-945666	-885994	-807764	-709398	-584609	-427337	-228816	21037	332781	713514	1160589	1678168	2256596	2889815
54	6.75	0	0	0	0	0	0	0	0	0	0	0	0	0	0	0	0	0	0	0	0	-1148854	-1144784	-1141724	-1138480	-1133967	-1127770	-1119554	-1109716	-1098715	-1086230	-1071082	-1052217	-1026589	-993112	-947838	-889100	-813884	-717768	-595044	-439853	-241423	6732	315079	690304	1135420	1652938	2239307	2889111
55	6.88	0	0	0	0	0	0	0	0	0	0	0	0	0	0	0	0	0	0	0	0	-1122262	-1120716	-1119569	-1117335	-1113464	-1108262	-1102004	-1094002	-1083965	-1070363	-1053135	-1031087	-1003241	-968784	-924062	-866594	-790980	-692782	-566402	-406697	-206753	40545	346031	717706	1160069	1675659	2259595	2901734
56	7.00	0	0	0	0	0	0	0	0	0	0	0	0	0	0	0	0	0	0	0	0	-1110802	-1108140	-1106778	-1105355	-1103060	-1099265	-1093283	-1084623	-1073087	-1058444	-1040864	-1019061	-992087	-957630	-913152	-855470	-780774	-685683	-563342	-407477	-212414	33171	336928	709873	1155846	1679912	2269816	2918304
57	7.13	0	0	0	0	0	0	0	0	0	0	0	0	0	0	0	0	0	0	0	0	-1105952	-1103259	-1100795	-1097506	-1092793	-1086887	-1080431	-1073041	-1063539	-1050565	-1033398	-1011273	-983381	-948894	-904799	-848157	-774578	-679792	-557283	-399460	-201306	50674	360842	737077	1181061	1690592	2262135	2887734
58	7.25	0	0	0	0	0	0	0	0	0	0	0	0	0	0	0	0	0	0	0	0	-1104697	-1103152	-1101331	-1098439	-1093803	-1087454	-1080599	-1073087	-1064488	-1053380	-1038324	-1018067	-990098	-953622	-906007	-844393	-765153	-664828	-537821	-377932	-179824	64475	363152	726213	1160054	1671681	2256795	2906691
59	7.38	0	0	0	0	0	0	0	0	0	0	0	0	0	0	0	0	0	0	0	0	-1090299	-1089580	-1089825	-1088739	-1085541	-1079574	-1072230	-1062988	-1052798	-1041247	-1027048	-1008213	-982172	-946691	-899030	-837462	-759354	-660866	-538050	-380809	-185929	59258	363229	733251	1173350	1687379	2270412	2909843
60	7.50	0	0	0	0	0	0	0	0	0	0	0	0	0	0	0	0	0	0	0	0	-1084516	-1082665	-1082389	-1081395	-1078442	-1073178	-1066018	-1057006	-1046831	-1034713	-1019398	-999400	-973344	-940035	-896368	-840063	-766897	-671408	-548730	-390540	-191024	56259	357813	719772	1145534	1638127	2200658	2827604
61	7.63	0	0	0	0	0	0	0	0	0	0	0	0	0	0	0	0	0	0	0	0	-1080859	-1080002	-1079911	-1078977	-1076422	-1072383	-1066599	-1058934	-1048836	-1035555	-1018403	-996463	-968647	-933257	-887754	-829613	-754672	-657500	-533445	-375010	-173413	77327	385016	760257	1201563	1716709	2296759	2941698
62	7.75	0	0	0	0	0	0	0	0	0	0	0	0	0	0	0	0	0	0	0	0	-1067976	-1065880	-1064549	-1062300	-1058322	-1053166	-1047321	-1040497	-1032204	-1021800	-1007433	-988093	-962022	-927412	-881527	-822009	-746134	-649987	-530614	-380748	-191712	45411	342788	710500	1153444	1670854	2258248	2901320
63	7.88	0	0	0	0	0	0	0	0	0	0	0	0	0	0	0	0	0	0	0	0	-1063570	-1061030	-1059684	-1057985	-1054864	-1050595	-1044766	-1036963	-1027461	-1015083	-999431	-979143	-952719	-917850	-871918	-813532	-738010	-641955	-520103	-363764	-167645	79729	386684	761649	1208999	1730143	2318394	2959997
64	8.00	0	0	0	0	0	0	0	0	0	0	0	0	0	0	0	0	0	0	0	0	-1043802	-1041522	-1039946	-1037972	-1034759	-1030185	-1024416	-1016567	-1006148	-992546	-975302	-954203	-927443	-894303	-851584	-796610	-725647	-634029	-516186	-365095	-173566	68545	370680	739647	1183126	1699252	2280051	2919742
65	8.13	0	0	0	0	0	0	0	0	0	0	0	0	0	0	0	0	0	0	0	0	-1051421	-1049754	-1048774	-1047306	-1043725	-1038187	-1030904	-1021662	-1010447	-997488	-981652	-961762	-936149	-902962	-859081	-802302	-727652	-631474	-505812	-345174	-142093	109657	420681	797681	1244450	1764339	2346531	2982259
66	8.25	0	0	0	0	0	0	0	0	0	0	0	0	0	0	0	0	0	0	0	0	-1035876	-1034499	-1034316	-1033382	-1030368	-1025441	-1018694	-1010248	-1000349	-988491	-972747	-952153	-925576	-891426	-847055	-790169	-716069	-620855	-498774	-344058	-148673	94494	396828	763164	1199941	1714215	2297218	2942845
67	8.38	0	0	0	0	0	0	0	0	0	0	0	0	0	0	0	0	0	0	0	0	-1020117	-1017072	-1015068	-1013370	-1010615	-1006132	-1000165	-991964	-981973	-969580	-954050	-935124	-909909	-877686	-835029	-778602	-704946	-609411	-487850	-333210	-140074	102542	402489	768029	1205052	1714460	2292338	2929932
68	8.50	0	0	0	0	0	0	0	0	0	0	0	0	0	0	0	0	0	0	0	0	-1018847	-1016537	-1015359	-1014242	-1011794	-1007479	-1001359	-993219	-983320	-970422	-954892	-934772	-908777	-875835	-832719	-777729	-705344	-611492	-489931	-331389	-131261	120535	431713	805775	1247786	1758418	2334138	2968535
69	8.63	0	0	0	0	0	0	0	0	0	0	0	0	0	0	0	0	0	0	0	0	-1005948	-1002170	-999356	-996541	-992473	-986768	-979610	-970861	-960949	-949891	-936707	-919607	-895930	-864406	-821396	-764070	-690118	-593253	-469515	-311088	-113903	130773	430635	794171	1228584	1742778	2331764	2986642
70	8.75	0	0	0	0	0	0	0	0	0	0	0	0	0	0	0	0	0	0	0	0	-1003582	-1001142	-999982	-998366	-995178	-989841	-982886	-974224	-963716	-951714	-936630	-917796	-893196	-861718	-819778	-765074	-692800	-598748	-477748	-322021	-128305	115037	414030	778555	1221211	1739466	2334737	2993360
71	8.88	0	0	0	0	0	0	0	0	0	0	0	0	0	0	0	0	0	0	0	0	-984406	-981456	-979646	-977106	-973061	-967419	-960667	-952775	-943574	-932853	-919349	-901252	-877239	-845623	-804046	-748630	-677292	-582687	-462214	-307630	-112078	130449	433137	803377	1245411	1764714	2351264	2996773
72	9.00	0	0	0	0	0	0	0	0	0	0	0	0	0	0	0	0	0	0	0	0	-980869	-976907	-973810	-971260	-968390	-964641	-959798	-953559	-944861	-933384	-919221	-900731	-876276	-844639	-802757	-747409	-675453	-582200	-461106	-306963	-111029	131295	429242	791326	1223376	1728931	2304892	2941803
73	9.13	0	0	0	0	0	0	0	0	0	0	0	0	0	0	0	0	0	0	0	0	-975783	-973339	-972520	-971047	-968102	-963609	-957294	-948944	-939138	-927737	-913923	-895600	-871630	-839448	-796411	-741261	-670383	-579134	-460954	-309392	-118771	120244	414092	768358	1193820	1688520	2252929	2877149
74	9.25	0	0	0	0	0	0	0	0	0	0	0	0	0	0	0	0	0	0	0	0	-966845	-964014	-962954	-962287	-960228	-956669	-950885	-942662	-932335	-919524	-903957	-884559	-860027	-828454	-787235	-732206	-660837	-566890	-448336	-295287	-103395	137709	438084	806800	1244082	1753627	2324303	2952780
75	9.38	0	0	0	0	0	0	0	0	0	0	0	0	0	0	0	0	0	0	0	0	-963084	-960802	-959653	-958217	-955315	-951098	-945400	-938311	-929560	-918042	-902731	-882870	-857009	-823892	-781631	-727006	-656783	-565867	-448818	-299590	-109295	129216	427824	795779	1237100	1755674	2342053	2987107
76	9.50	0	0	0	0	0	0	0	0	0	0	0	0	0	0	0	0	0	0	0	0	-950751	-949088	-948635	-947471	-944674	-939883	-933369	-925086	-915004	-902232	-886588	-866788	-841531	-810032	-768874	-715534	-646127	-556723	-441850	-294239	-106000	133357	434958	805361	1245504	1760330	2343307	2988543
77	9.63	0	0	0	0	0	0	0	0	0	0	0	0	0	0	0	0	0	0	0	0	-952731	-948453	-944871	-941379	-937495	-933127	-928094	-922199	-914037	-903305	-889218	-871111	-847108	-816320	-775525	-722623	-653458	-564492	-448546	-299363	-110277	128173	423274	784609	1215849	1719308	2288834	2914601
78	9.75	0	0	0	0	0	0	0	0	0	0	0	0	0	0	0	0	0	0	0	0	-942846	-940699	-940170	-939566	-937737	-933988	-928653	-920869	-911316	-899693	-885122	-866274	-841697	-809835	-768602	-715610	-647956	-560759	-447866	-301237	-114736	122460	419526	781117	1213023	1721091	2298598	2936412
79	9.88	0	0	0	0	0	0	0	0	0	0	0	0	0	0	0	0	0	0	0	0	-960847	-955315	-951703	-948967	-946307	-942513	-937193	-929756	-920642	-909548	-895476	-877489	-854076	-823167	-781888	-727309	-656284	-563449	-444496	-292849	-101964	134446	429048	785697	1215381	1719822	2289710	2916717
80	10.00	0	0	0	0	0	0	0	0	0	0	0	0	0	0	0	0	0	0	0	0	-966364	-961467	-957945	-954801	-951506	-947214	-941682	-934351	-924874	-913387	-899073	-881192	-858112	-827852	-787753	-734745	-664068	-572503	-455454	-306361	-118107	117472	413571	779878	1220142	1735874	2321663	2964631
81	10.13	0	0	0	0	0	0	0	0	0	0	0	0	0	0	0	0	0	0	0	0	-955965	-955209	-955829	-956011	-954303	-950675	-944931	-936875	-927005	-915548	-901537	-884563	-862541	-833263	-793239	-739718	-667620	-574301	-453912	-300618	-106619	136819	438964	808656	1253364	1771590	2353601	2988739
82	10.25	0	0	0	0	0	0	0	0	0	0	0	0	0	0	0	0	0	0	0	0	-947320	-946851	-947471	-947380	-945672	-941213	-935061	-926839	-916848	-904817	-890034	-872290	-849300	-818481	-776900	-720507	-647593	-554516	-439009	-294708	-113224	112605	396143	747472	1174102	1683471	2266222	2912531
83	10.38	0	0	0	0	0	0	0	0	0	0	0	0	0	0	0	0	0	0	0	0	-952655	-950010	-948801	-947425	-944856	-940971	-935349	-927519	-917135	-904545	-888765	-869539	-845718	-815065	-774557	-720900	-650011	-557690	-436349	-281377	-84612	158524	458250	817786	1247258	1745215	2308921	2928159
84	10.50	0	0	0	0	0	0	0	0	0	0	0	0	0	0	0	0	0	0	0	0	-946367	-944191	-943057	-941077	-937933	-933580	-928577	-922259	-914687	-905361	-892831	-875570	-851915	-819101	-775963	-718890	-645311	-550511	-428821	-273063	-77266	168953	469465	836634	1268993	1774069	2342612	2967503
85	10.63	0	0	0	0	0	0	0	0	0	0	0	0	0	0	0	0	0	0	0	0	-949738	-946957	-946095	-945778	-944523	-941289	-935772	-927595	-917392	-905013	-890050	-871232	-846836	-815488	-774180	-720643	-651039	-560623	-443211	-294980	-108645	123382	407283	756934	1178682	1679208	2254523	2899849
86	10.75	0	0	0	0	0	0	0	0	0	0	0	0	0	0	0	0	0	0	0	0	-944448	-942347	-941349	-940095	-937404	-933384	-928381	-921760	-913795	-903139	-888689	-869055	-843239	-810107	-766471	-710773	-638887	-547004	-429743	-280621	-91066	147354	448199	815458	1250885	1754601	2318700	2937788
87	10.88	0	0	0	0	0	0	0	0	0	0	0	0	0	0	0	0	0	0	0	0	-969780	-964732	-961074	-958459	-956147	-953456	-949587	-943405	-934684	-923287	-909140	-891274	-867634	-835984	-793375	-737315	-665036	-573410	-455998	-306996	-119013	116232	407767	766940	1198180	1711735	2295998	2946615
88	11.00	0	0	0	0	0	0	0	0	0	0	0	0	0	0	0	0	0	0	0	0	-974284	-971216	-969372	-967800	-965669	-962359	-957250	-950403	-940382	-927852	-912102	-892680	-868723	-838463	-799935	-748756	-680468	-591744	-474937	-323426	-131423	114192	420372	795794	1240773	1756778	2340511	2975166
89	11.13	0	0	0	0	0	0	0	0	0	0	0	0	0	0	0	0	0	0	0	0	-962752	-960469	-959683	-958777	-956781	-953003	-947456	-939883	-930421	-918450	-903955	-884669	-859457	-825963	-782583	-726780	-654909	-563555	-446173	-295222	-106302	131755	426721	786574	1216998	1719640	2295832	2932800
90	11.25	0	0	0	0	0	0	0	0	0	0	0	0	0	0	0	0	0	0	0	0	-995445	-992074	-989384	-986316	-982068	-976627	-970052	-962162	-952806	-941531	-927580	-909397	-885198	-853759	-811770	-757342	-685138	-591986	-470145	-313964	-117457	127055	428368	790141	1222802	1727122	2304281	2941385
91	11.38	0	0	0	0	0	0	0	0	0	0	0	0	0	0	0	0	0	0	0	0	-988039	-985394	-984003	-981812	-978713	-973498	-966621	-957628	-947093	-934139	-918239	-898484	-873756	-841939	-801144	-747714	-677309	-584096	-463631	-309777	-116776	121915	416382	778487	1212161	1723313	2307727	2953598
92	11.50	0	0	0	0	0	0	0	0	0	0	0	0	0	0	0	0	0	0	0	0	-995082	-993737	-993389	-992422	-989777	-985243	-979423	-971790	-963009	-951733	-937525	-918934	-894448	-862450	-820370	-765080	-694071	-603231	-488328	-342848	-159143	73412	366594	730528	1171517	1688187	2272102	2913347
93	11.63	0	0	0	0	0	0	0	0	0	0	0	0	0	0	0	0	0	0	0	0	-1004514	-1002564	-1001763	-1001083	-999451	-996488	-992241	-986044	-977685	-966606	-952066	-932945	-908127	-875736	-833535	-778654	-708203	-617318	-500602	-351645	-163345	74289	368529	730573	1167557	1685451	2270545	2915569
94	11.75	0	0	0	0	0	0	0	0	0	0	0	0	0	0	0	0	0	0	0	0	-1011104	-1006328	-1002473	-998544	-994871	-990397	-984940	-977595	-967422	-954000	-936845	-915034	-888221	-854757	-812601	-758415	-687708	-595916	-475813	-320358	-123442	123518	425799	789445	1221260	1722240	2290149	2920798
95	11.88	0	0	0	0	0	0	0	0	0	0	0	0	0	0	0	0	0	0	0	0	-1014203	-1012192	-1011074	-1009502	-1007038	-1003864	-999980	-994629	-986784	-975887	-960439	-940216	-914460	-881767	-839929	-786256	-715897	-625193	-509217	-361787	-174696	61638	358991	725752	1166182	1685103	2275926	2925454
96	12.00	0	0	0	0	0	0	0	0	0	0	0	0	0	0	0	0	0	0	0	0	-1042452	-1037721	-1034426	-1030995	-1027050	-1021684	-1015215	-1006827	-997516	-986089	-972471	-954786	-931963	-901869	-861014	-807024	-734911	-640051	-518346	-362135	-166746	77720	379532	745839	1182430	1690469	2261763	2890463
97	12.13	0	0	0	0	0	0	0	0	0	0	0	0	0	0	0	0	0	0	0	0	-1020158	-1018102	-1016545	-1014142	-1010787	-1006494	-1001869	-996155	-988523	-977670	-962918	-943647	-918148	-885681	-843995	-789294	-718874	-627914	-509852	-359384	-169028	69558	363616	720537	1146366	1647301	2215527	2848731
98	12.25	0	0	0	0	0	0	0	0	0	0	0	0	0	0	0	0	0	0	0	0	-1040986	-1039762	-1039747	-1039429	-1037706	-1034033	-1028199	-1019931	-1009804	-996926	-981630	-962601	-937646	-904424	-860001	-802217	-727958	-634005	-514749	-363767	-173396	65280	360503	722033	1157189	1667872	2252845	2895678
99	12.38	0	0	0	0	0	0	0	0	0	0	0	0	0	0	0	0	0	0	0	0	-1052670	-1050025	-1049722	-1050161	-1050010	-1047999	-1043178	-1035756	-1026037	-1013764	-998695	-979030	-953577	-920657	-877504	-821428	-747653	-651281	-528262	-371400	-177719	64827	362271	725676	1158383	1663051	2237549	2871298
100	12.50	0	0	0	0	0	0	0	0	0	0	0	0	0	0	0	0	0	0	0	0	-1095203	-1092255	-1090033	-1087328	-1082899	-1076309	-1068057	-1058625	-1048241	-1036300	-1022334	-1004454	-980497	-948438	-904998	-847381	-771217	-673923	-548455	-389221	-191171	53733	354608	718663	1152866	1663126	2246195	2890841
101	12.63	0	0	0	0	0	0	0	0	0	0	0	0	0	0	0	0	0	0	0	0	-1070792	-1067422	-1064731	-1062056	-1058444	-1053350	-1046639	-1038054	-1027776	-1015593	-1001038	-983036	-958777	-926325	-882976	-825041	-750661	-655105	-531980	-376554	-180168	62711	364674	729485	1163703	1670124	2240315	2869710
102	12.75	0	0	0	0	0	0	0	0	0	0	0	0	0	0	0	0	0	0	0	0	-1091726	-1090880	-1091409	-1091847	-1090880	-1088084	-1083005	-1074949	-1064369	-1051052	-1034744	-1014792	-989157	-956041	-911845	-854772	-779953	-683491	-559474	-401177	-201903	42744	341775	701916	1127110	1625521	2194547	2826271
103	12.88	0	0	0	0	0	0	0	0	0	0	0	0	0	0	0	0	0	0	0	0	-1095173	-1092286	-1090306	-1088205	-1085076	-1080239	-1073966	-1065517	-1055405	-1042724	-1027050	-1007174	-981539	-948997	-906434	-850252	-776628	-680906	-557237	-401025	-206785	36517	334339	695764	1126218	1628151	2195364	2823232
104	13.00	0	0	0	0	0	0	0	0	0	0	0	0	0	0	0	0	0	0	0	0	-1101294	-1097228	-1094235	-1091092	-1086965	-1081116	-1073740	-1064550	-1054317	-1042800	-1028894	-1011285	-987918	-956857	-914959	-859593	-786770	-692544	-570236	-413964	-216731	31091	333644	695673	1120354	1611207	2169563	2794741
105	13.13	0	0	0	0	0	0	0	0	0	0	0	0	0	0	0	0	0	0	0	0	-1112086	-1112751	-1114610	-1115487	-1114021	-1109955	-1103682	-1095036	-1084849	-1072742	-1057960	-1038991	-1013840	-980708	-936769	-879348	-804454	-707826	-583174	-424030	-223154	26843	334626	707584	1148059	1660270	2242809	2885445
106	13.25	0	0	0	0	0	0	0	0	0	0	0	0	0	0	0	0	0	0	0	0	-1132355	-1127110	-1122742	-1119009	-1115260	-1111345	-1106418	-1099903	-1091545	-1079846	-1064731	-1044568	-1017694	-982673	-936890	-878351	-803230	-708188	-586711	-432782	-238738	6333	311772	683959	1124888	1633713	2203450	2823807
107	13.38	0	0	0	0	0	0	0	0	0	0	0	0	0	0	0	0	0	0	0	0	-1142527	-1140865	-1140608	-1140441	-1138945	-1135348	-1129287	-1120732	-1110136	-1097304	-1081872	-1062086	-1035318	-999677	-951582	-889808	-811060	-713781	-592847	-440490	-250104	-8585	292985	661423	1102564	1614200	2193731	2829550
108	13.50	0	0	0	0	0	0	0	0	0	0	0	0	0	0	0	0	0	0	0	0	-1155269	-1152639	-1151158	-1150175	-1148452	-1145339	-1140169	-1132446	-1122107	-1108731	-1092467	-1072289	-1045913	-1012102	-967316	-908777	-832477	-734095	-609262	-452204	-257284	-16943	277749	639401	1073997	1583713	2163834	2804142
109	13.63	0	0	0	0	0	0	0	0	0	0	0	0	0	0	0	0	0	0	0	0	-1145732	-1144537	-1144250	-1143495	-1140985	-1136648	-1130617	-1123256	-1113870	-1102443	-1087388	-1067089	-1040049	-1004559	-958112	-898045	-821882	-724301	-598455	-438737	-235382	17034	323759	690066	1121714	1624342	2195182	2832694
110	13.75	0	0	0	0	0	0	0	0	0	0	0	0	0	0	0	0	0	0	0	0	-1165366	-1160816	-1157657	-1155329	-1153440	-1150402	-1146321	-1140472	-1132642	-1121956	-1106660	-1085469	-1056327	-1017301	-967226	-902791	-822562	-721610	-596611	-440702	-245282	-1889	299922	666517	1103561	1609136	2181322	2811035
111	13.88	0	0	0	0	0	0	0	0	0	0	0	0	0	0	0	0	0	0	0	0	-1178002	-1175976	-1175477	-1175115	-1173936	-1170459	-1164988	-1156357	-1145429	-1132007	-1115381	-1094266	-1067059	-1030980	-984185	-922652	-844222	-743995	-617666	-458552	-262785	-19664	280636	646203	1083564	1594233	2168217	2794650
112	14.00	0	0	0	0	0	0	0	0	0	0	0	0	0	0	0	0	0	0	0	0	-1188884	-1190214	-1192799	-1194567	-1194401	-1191484	-1185861	-1177699	-1166998	-1153531	-1136194	-1114444	-1085907	-1048664	-1000871	-939309	-861528	-763388	-638842	-480756	-281558	-33176	272005	639900	1076763	1586736	2164273	2801815
113	14.13	0	0	0	0	0	0	0	0	0	0	0	0	0	0	0	0	0	0	0	0	-1185771	-1187358	-1190245	-1191832	-1190743	-1186315	-1179105	-1169084	-1156977	-1142482	-1125342	-1103289	-1074752	-1037751	-989868	-928502	-849874	-749920	-622775	-462543	-262664	-15961	286591	652672	1088416	1598299	2181488	2823867
114	14.25	0	0	0	0	0	0	0	0	0	0	0	0	0	0	0	0	0	0	0	0	-1191424	-1192225	-1193570	-1193313	-1190910	-1186360	-1180616	-1172621	-1162841	-1150553	-1133851	-1112464	-1084365	-1048150	-1001551	-941591	-864611	-764415	-635668	-470856	-263707	-6786	302250	671913	1103047	1602123	2163275	2784010
115	14.38	0	0	0	0	0	0	0	0	0	0	0	0	0	0	0	0	0	0	0	0	-1184546	-1184350	-1185227	-1185816	-1185030	-1182521	-1178364	-1171941	-1162721	-1149918	-1132899	-1110514	-1081025	-1042709	-993223	-928532	-847260	-744207	-616018	-455605	-256301	-10444	292652	658763	1094371	1602879	2175503	2800711
116	14.50	0	0	0	0	0	0	0	0	0	0	0	0	0	0	0	0	0	0	0	0	-1213854	-1212463	-1211874	-1210121	-1207203	-1202775	-1197228	-1190456	-1181327	-1169492	-1153138	-1130783	-1101309	-1062404	-1012812	-950358	-871942	-772895	-649120	-491896	-297005	-52644	248033	614688	1053017	1563807	2144094	2785672
117	14.63	0	0	0	0	0	0	0	0	0	0	0	0	0	0	0	0	0	0	0	0	-1217995	-1215743	-1215139	-1214942	-1214111	-1211466	-1206417	-1198271	-1187312	-1173482	-1156750	-1135695	-1108126	-1071593	-1022652	-958837	-877247	-774709	-645175	-484988	-284505	-40704	257525	622140	1058217	1577894	2172812	2828795
118	14.75	0	0	0	0	0	0	0	0	0	0	0	0	0	0	0	0	0	0	0	0	-1241620	-1241242	-1241711	-1241816	-1240683	-1237584	-1232566	-1224585	-1213023	-1197999	-1178274	-1154196	-1123090	-1083912	-1033066	-968238	-885999	-783279	-655407	-495417	-296416	-51647	249348	613237	1043450	1544732	2115799	2750938
119	14.88	0	0	0	0	0	0	0	0	0	0	0	0	0	0	0	0	0	0	0	0	-1217618	-1218615	-1220459	-1221396	-1220096	-1216333	-1210393	-1202140	-1191832	-1177941	-1160423	-1137388	-1107642	-1069704	-1021715	-960243	-883293	-785259	-660773	-503776	-305545	-59053	245917	615550	1059199	1572936	2149898	2776634
120	15.00	0	0	0	0	0	0	0	0	0	0	0	0	0	0	0	0	0	0	0	0	-1249132	-1249026	-1249646	-1249343	-1247560	-1243388	-1237463	-1228712	-1216680	-1200840	-1181357	-1157400	-1127594	-1090321	-1042150	-978955	-898393	-796262	-668784	-509504	-313057	-69029	231407	598742	1038341	1548904	2123085	2751407
121	15.13	0	0	0	0	0	0	0	0	0	0	0	0	0	0	0	0	0	0	0	0	-1244718	-1244522	-1245111	-1245066	-1243630	-1239942	-1233730	-1225205	-1213385	-1198936	-1180526	-1157385	-1127246	-1088643	-1038522	-974466	-894025	-793587	-666290	-508008	-310034	-62922	240204	606330	1041485	1542631	2107350	2725863
122	15.25	0	0	0	0	0	0	0	0	0	0	0	0	0	0	0	0	0	0	0	0	-1239307	-1236738	-1235151	-1233579	-1231765	-1228969	-1225009	-1218630	-1209229	-1195459	-1177065	-1152805	-1121412	-1081252	-1029877	-963931	-881343	-777369	-647699	-487240	-290884	-52614	235382	584156	1003592	1505297	2082622	2723822
123	15.38	0	0	0	0	0	0	0	0	0	0	0	0	0	0	0	0	0	0	0	0	-1246457	-1246744	-1247847	-1248346	-1246895	-1243086	-1236919	-1228107	-1216469	-1201369	-1182158	-1158141	-1127246	-1088613	-1038900	-975645	-894191	-791728	-662935	-502718	-308220	-68847	223578	581436	1012313	1519082	2100307	2739481
124	15.50	0	0	0	0	0	0	0	0	0	0	0	0	0	0	0	0	0	0	0	0	-1240018	-1239398	-1239836	-1239761	-1238461	-1235423	-1230526	-1223633	-1214489	-1202049	-1184970	-1161844	-1130964	-1091711	-1041439	-978078	-898741	-798439	-671263	-512028	-312105	-64812	239433	606239	1042059	1549100	2121059	2746359
125	15.63	0	0	0	0	0	0	0	0	0	0	0	0	0	0	0	0	0	0	0	0	-1256931	-1257052	-1258065	-1258291	-1256372	-1251384	-1243766	-1233186	-1220217	-1203939	-1184788	-1160997	-1130919	-1093041	-1044553	-982446	-903547	-805543	-683309	-529939	-341004	-104549	187332	545568	972758	1476579	2051743	2692066
126	15.75	0	0	0	0	0	0	0	0	0	0	0	0	0	0	0	0	0	0	0	0	-1262327	-1260634	-1259833	-1258805	-1256871	-1253424	-1247938	-1240093	-1228954	-1214534	-1195641	-1171910	-1141363	-1102322	-1052398	-988779	-907643	-805558	-677158	-516261	-317259	-70858	230923	596913	1032008	1538867	2107441	2729747
127	15.88	0	0	0	0	0	0	0	0	0	0	0	0	0	0	0	0	0	0	0	0	-1284561	-1283699	-1283337	-1281901	-1278696	-1273028	-1265516	-1255556	-1244159	-1229785	-1212206	-1189716	-1160514	-1121926	-1072576	-1009184	-929665	-830210	-705196	-548092	-350164	-105879	197867	563147	996473	1503076	2078148	2712335
128	16.00	0	0	0	0	0	0	0	0	0	0	0	0	0	0	0	0	0	0	0	0	-1275265	-1275371	-1276868	-1278046	-1277472	-1274207	-1268267	-1258412	-1245459	-1229543	-1210151	-1186194	-1155481	-1115865	-1064384	-998559	-917166	-816713	-693754	-541548	-349756	-106090	200437	577612	1026929	1547135	2124944	2755745
129	16.13	0	0	0	0	0	0	0	0	0	0	0	0	0	0	0	0	0	0	0	0	-1269492	-1266967	-1266091	-1265864	-1265108	-1262433	-1256961	-1247469	-1234667	-1217784	-1196910	-1171306	-1140094	-1101082	-1052473	-990820	-912767	-814460	-690141	-532328	-333931	-84280	222187	595870	1037086	1552531	2136099	2778266
130	16.25	0	0	0	0	0	0	0	0	0	0	0	0	0	0	0	0	0	0	0	0	-1257989	-1258276	-1259924	-1261450	-1261420	-1258745	-1253168	-1243434	-1229936	-1211738	-1189610	-1162811	-1131040	-1093192	-1046125	-986255	-909124	-809714	-683445	-525647	-331815	-95329	196371	552793	983429	1490636	2066374	2698898
131	16.38	0	0	0	0	0	0	0	0	0	0	0	0	0	0	0	0	0	0	0	0	-1262085	-1262705	-1264322	-1265184	-1264080	-1260317	-1253938	-1244794	-1232627	-1217179	-1197122	-1171759	-1139323	-1099495	-1049556	-988084	-910938	-813191	-689461	-531391	-331376	-82390	226495	599513	1040714	1545896	2108816	2722402
132	16.50	0	0	0	0	0	0	0	0	0	0	0	0	0	0	0	0	0	0	0	0	-1257732	-1261738	-1266030	-1267738	-1265834	-1259833	-1251399	-1239791	-1226188	-1210241	-1190940	-1167512	-1137706	-1099752	-1051506	-990004	-912782	-815549	-692288	-535487	-340188	-93953	209128	576674	1009729	1511782	2073191	2691855
133	16.63	0	0	0	0	0	0	0	0	0	0	0	0	0	0	0	0	0	0	0	0	-1270172	-1268418	-1267527	-1266106	-1263053	-1257687	-1249570	-1239307	-1226429	-1210226	-1190366	-1165623	-1134909	-1096578	-1048211	-986724	-907764	-807009	-678760	-518845	-321280	-79760	215718	575586	1010530	1520473	2096800	2725228
134	16.75	0	0	0	0	0	0	0	0	0	0	0	0	0	0	0	0	0	0	0	0	-1270973	-1270534	-1271154	-1271154	-1268917	-1263189	-1254377	-1243146	-1229891	-1214398	-1195973	-1172832	-1142467	-1103607	-1053667	-990472	-911452	-812511	-688569	-532962	-337921	-94316	206770	574589	1015850	1530025	2109617	2747749
135	16.88	0	0	0	0	0	0	0	0	0	0	0	0	0	0	0	0	0	0	0	0	-1253863	-1252714	-1252684	-1252246	-1250069	-1244930	-1236617	-1224978	-1210332	-1193026	-1172832	-1148906	-1119885	-1083534	-1037268	-978486	-902867	-806495	-683052	-526236	-329714	-86577	214327	579879	1019478	1536479	2120440	2760597
136	17.00	0	0	0	0	0	0	0	0	0	0	0	0	0	0	0	0	0	0	0	0	-1275507	-1276127	-1277593	-1277533	-1274857	-1268947	-1260559	-1249510	-1236360	-1220897	-1202155	-1178999	-1149329	-1111723	-1062782	-1000403	-921156	-819932	-692393	-532388	-332510	-85897	216126	581466	1018737	1527123	2101637	2732529
137	17.13	0	0	0	0	0	0	0	0	0	0	0	0	0	0	0	0	0	0	0	0	-1274011	-1273618	-1273799	-1272681	-1269386	-1263204	-1254210	-1242496	-1228440	-1211934	-1192436	-1168797	-1139489	-1102307	-1055421	-995067	-918375	-819207	-694313	-535547	-338495	-93893	207450	573138	1014218	1526715	2106655	2743215
138	17.25	0	0	0	0	0	0	0	0	0	0	0	0	0	0	0	0	0	0	0	0	-1274132	-1273648	-1273588	-1272741	-1269900	-1264579	-1256614	-1245822	-1231961	-1216136	-1197243	-1174601	-1145656	-1107748	-1058232	-994720	-913916	-813312	-685879	-526826	-328202	-81997	220026	586408	1022077	1531219	2105159	2736882
139	17.38	0	0	0	0	0	0	0	0	0	0	0	0	0	0	0	0	0	0	0	0	-1257687	-1257868	-1258987	-1259531	-1258216	-1254044	-1246819	-1236405	-1222817	-1206387	-1186814	-1163204	-1133882	-1097047	-1050372	-990548	-914022	-817226	-693723	-537996	-344420	-103687	194391	560789	999466	1513157	2094306	2735234
140	17.50	0	0	0	0	0	0	0	0	0	0	0	0	0	0	0	0	0	0	0	0	-1265698	-1265274	-1265395	-1264776	-1262448	-1257883	-1250522	-1239700	-1225628	-1207929	-1186934	-1162192	-1132204	-1095248	-1047576	-986799	-908928	-809457	-684745	-527778	-331875	-88723	209415	570583	997637	1495140	2060585	2695044
141	17.63	0	0	0	0	0	0	0	0	0	0	0	0	0	0	0	0	0	0	0	0	-1254709	-1251853	-1250250	-1248754	-1246804	-1242935	-1236904	-1228258	-1216454	-1201550	-1182445	-1158186	-1127594	-1088416	-1039369	-976869	-898363	-800101	-675571	-519616	-324937	-81544	220343	585562	1019825	1522740	2088714	2714890
142	17.75	0	0	0	0	0	0	0	0	0	0	0	0	0	0	0	0	0	0	0	0	-1258337	-1255616	-1254346	-1253364	-1251067	-1246517	-1238793	-1228183	-1215033	-1199223	-1180072	-1156690	-1127367	-1090003	-1042195	-981267	-903018	-803910	-676236	-513706	-308734	-53355	256483	631254	1070369	1581476	2160116	2795920
143	17.88	0	0	0	0	0	0	0	0	0	0	0	0	0	0	0	0	0	0	0	0	-1261330	-1260725	-1260952	-1259969	-1256901	-1251550	-1243600	-1232611	-1219008	-1202125	-1181130	-1155360	-1124148	-1085167	-1037253	-977504	-901884	-807568	-687285	-534761	-341957	-99803	201041	566003	998861	1505827	2078723	2715464
144	18.00	0	0	0	0	0	0	0	0	0	0	0	0	0	0	0	0	0	0	0	0	-1254452	-1255223	-1256992	-1258019	-1256704	-1252321	-1245111	-1234879	-1222333	-1206538	-1186874	-1162796	-1132143	-1093903	-1045143	-983323	-905784	-808248	-686302	-531511	-336138	-88285	220192	600510	1053214	1575717	2161204	2794061
145	18.13	0	0	0	0	0	0	0	0	0	0	0	0	0	0	0	0	0	0	0	0	-1250371	-1251853	-1254074	-1255102	-1253288	-1248512	-1241499	-1231614	-1219280	-1204165	-1185302	-1161753	-1132325	-1095278	-1047697	-986467	-908036	-808203	-681753	-519873	-317803	-67593	237498	601115	1031388	1528166	2089696	2711534
146	18.25	0	0	0	0	0	0	0	0	0	0	0	0	0	0	0	0	0	0	0	0	-1254860	-1253273	-1252215	-1250810	-1247817	-1242617	-1235060	-1225387	-1213340	-1198784	-1181342	-1159743	-1131871	-1096291	-1049360	-989112	-911452	-813055	-687421	-530559	-333372	-90084	207964	570160	1001778	1510935	2091676	2737698
147	18.38	0	0	0	0	0	0	0	0	0	0	0	0	0	0	0	0	0	0	0	0	-1261843	-1260241	-1259440	-1258397	-1255631	-1250190	-1241711	-1231221	-1218751	-1203999	-1186814	-1165471	-1137509	-1100705	-1052609	-989974	-911422	-812405	-688524	-529834	-329593	-78596	227628	599226	1035650	1543462	2119805	2759418
148	18.50	0	0	0	0	0	0	0	0	0	0	0	0	0	0	0	0	0	0	0	0	-1237584	-1236738	-1236375	-1235151	-1231961	-1226263	-1218222	-1206977	-1193479	-1177049	-1157612	-1134290	-1105828	-1070263	-1024783	-966863	-892377	-796444	-674890	-520780	-326268	-85353	213662	582010	1024269	1543810	2130960	2775606
149	18.63	0	0	0	0	0	0	0	0	0	0	0	0	0	0	0	0	0	0	0	0	-1242663	-1243056	-1243857	-1243252	-1240652	-1235861	-1229211	-1220187	-1208231	-1192905	-1173513	-1149223	-1119054	-1082280	-1035318	-976582	-901628	-805195	-681783	-525133	-325527	-79262	223532	588101	1020037	1527290	2107773	2755911
150	18.75	0	0	0	0	0	0	0	0	0	0	0	0	0	0	0	0	0	0	0	0	-1245504	-1245308	-1245822	-1245081	-1242421	-1237206	-1229861	-1220006	-1207657	-1192844	-1174676	-1152155	-1123316	-1086421	-1039051	-977821	-900675	-803276	-680347	-525163	-327824	-80531	228445	602173	1042996	1555630	2132773	2774759
151	18.88	0	0	0	0	0	0	0	0	0	0	0	0	0	0	0	0	0	0	0	0	-1236662	-1234062	-1232536	-1231221	-1228802	-1224963	-1218933	-1210211	-1199057	-1184879	-1167542	-1145429	-1117210	-1080980	-1034487	-974617	-897501	-797456	-668844	-504214	-299499	-47324	258145	624316	1056312	1564291	2140618	2780775
152	19.00	0	0	0	0	0	0	0	0	0	0	0	0	0	0	0	0	0	0	0	0	-1233821	-1234546	-1236027	-1235861	-1233518	-1227775	-1219855	-1209289	-1196608	-1182249	-1165139	-1144522	-1118026	-1083323	-1037827	-977141	-899663	-799784	-673349	-514870	-316020	-69074	232979	599815	1037086	1544823	2124944	2768048
153	19.13	0	0	0	0	0	0	0	0	0	0	0	0	0	0	0	0	0	0	0	0	-1235634	-1234138	-1233231	-1231720	-1228621	-1223648	-1216605	-1207612	-1196925	-1183700	-1167179	-1145852	-1117709	-1081327	-1034109	-974043	-898106	-802338	-681284	-527506	-333538	-87680	220267	600465	1052322	1577259	2160796	2795557
154	19.25	0	0	0	0	0	0	0	0	0	0	0	0	0	0	0	0	0	0	0	0	-1224344	-1226263	-1229195	-1231236	-1231206	-1228092	-1221472	-1211587	-1198769	-1182672	-1163355	-1139897	-1110937	-1073936	-1026627	-966349	-889505	-793617	-670749	-516351	-320615	-74742	230621	602929	1042936	1557640	2134496	2768366
155	19.38	0	0	0	0	0	0	0	0	0	0	0	0	0	0	0	0	0	0	0	0	-1215955	-1219084	-1222757	-1224132	-1222469	-1217814	-1211284	-1202412	-1191303	-1177488	-1159637	-1136723	-1107567	-1070505	-1021911	-959804	-880437	-780241	-655241	-499891	-304321	-63225	236622	601599	1036043	1544143	2119049	2750394
156	19.50	0	0	0	0	0	0	0	0	0	0	0	0	0	0	0	0	0	0	0	0	-1227911	-1228772	-1230480	-1231508	-1230510	-1227170	-1221245	-1212448	-1200659	-1185892	-1167663	-1145066	-1116787	-1080753	-1034048	-974995	-898665	-803139	-681208	-526010	-329185	-81514	227613	604894	1057476	1587960	2190436	2845466
157	19.63	0	0	0	0	0	0	0	0	0	0	0	0	0	0	0	0	0	0	0	0	-1223437	-1224162	-1225266	-1225145	-1222560	-1217028	-1209576	-1199676	-1187887	-1173422	-1156131	-1134093	-1105587	-1069356	-1022773	-962616	-886059	-788750	-665625	-510064	-317274	-77644	216972	574150	1003577	1510210	2088230	2733194
158	19.75	0	0	0	0	0	0	0	0	0	0	0	0	0	0	0	0	0	0	0	0	-1226309	-1226913	-1228273	-1228304	-1225689	-1219885	-1211390	-1200356	-1187116	-1171941	-1154392	-1133368	-1106584	-1072485	-1027368	-967755	-890639	-791773	-667197	-511439	-317637	-81151	213783	572820	1004846	1511192	2088955	2732317
159	19.88	0	0	0	0	0	0	0	0	0	0	0	0	0	0	0	0	0	0	0	0	-1230374	-1231599	-1233322	-1233730	-1231402	-1227200	-1221064	-1212101	-1200734	-1185967	-1166938	-1143359	-1113522	-1076823	-1029393	-970203	-894629	-799965	-680967	-529879	-339327	-97142	206906	579395	1027368	1546652	2137867	2785854
160	20.00	0	0	0	0	0	0	0	0	0	0	0	0	0	0	0	0	0	0	0	0	-1218676	-1217799	-1217240	-1215456	-1211813	-1206100	-1198543	-1189096	-1176883	-1161496	-1142678	-1119628	-1092270	-1058655	-1015835	-960878	-888961	-795733	-676341	-524226	-332888	-97762	194330	547745	973846	1479527	2063411	2716053
161	20.13	0	0	0	0	0	0	0	0	0	0	0	0	0	0	0	0	0	0	0	0	-1229740	-1228440	-1228228	-1227684	-1225900	-1221759	-1214791	-1204951	-1192194	-1176792	-1158247	-1136391	-1109108	-1075130	-1031569	-975373	-901990	-808218	-685713	-528655	-329306	-77977	231709	608174	1054831	1570548	2147374	2778704
162	20.25	0	0	0	0	0	0	0	0	0	0	0	0	0	0	0	0	0	0	0	0	-1229724	-1228591	-1227850	-1226550	-1223543	-1218328	-1211209	-1202095	-1190517	-1176520	-1159229	-1137645	-1109320	-1073196	-1025735	-964702	-887223	-790791	-670159	-517485	-324046	-76919	232390	613585	1063023	1582338	2163759	2800953
163	20.38	0	0	0	0	0	0	0	0	0	0	0	0	0	0	0	0	0	0	0	0	-1227835	-1228319	-1229044	-1228576	-1225507	-1219960	-1212554	-1203168	-1191892	-1177442	-1159622	-1136814	-1107793	-1071760	-1025206	-965896	-889203	-792151	-667545	-510472	-313284	-67049	236682	607070	1046881	1559484	2142749	2785264
164	20.50	0	0	0	0	0	0	0	0	0	0	0	0	0	0	0	0	0	0	0	0	-1230571	-1232687	-1235770	-1237766	-1236889	-1232687	-1225326	-1215260	-1202729	-1187660	-1169825	-1148135	-1120853	-1086194	-1040578	-981751	-905225	-807145	-683929	-526146	-329517	-81498	225331	599513	1044221	1562824	2148674	2795633
165	20.63	0	0	0	0	0	0	0	0	0	0	0	0	0	0	0	0	0	0	0	0	-1222348	-1223316	-1224994	-1226157	-1224963	-1220897	-1213914	-1204150	-1191968	-1177231	-1159395	-1137721	-1110302	-1075569	-1030421	-972017	-895551	-798197	-674225	-517908	-322716	-81755	218529	588237	1031585	1552622	2142779	2793411
166	20.75	0	0	0	0	0	0	0	0	0	0	0	0	0	0	0	0	0	0	0	0	-1222182	-1220142	-1218540	-1216393	-1212509	-1206266	-1197681	-1186451	-1172303	-1155934	-1137207	-1115230	-1088446	-1054483	-1009698	-949904	-871670	-771807	-645114	-489674	-296582	-61305	231543	592560	1032673	1551896	2145273	2801739
167	20.88	0	0	0	0	0	0	0	0	0	0	0	0	0	0	0	0	0	0	0	0	-1226777	-1223739	-1221517	-1219280	-1215940	-1211073	-1204060	-1194613	-1182083	-1166514	-1147364	-1123815	-1095218	-1059607	-1014278	-956509	-882190	-787208	-665126	-509701	-313677	-66459	238269	613192	1061542	1583698	2175805	2827616
168	21.00	0	0	0	0	0	0	0	0	0	0	0	0	0	0	0	0	0	0	0	0	-1214852	-1211556	-1210241	-1209259	-1207702	-1204286	-1197757	-1188370	-1176263	-1161572	-1143600	-1121246	-1093329	-1056947	-1009789	-949753	-873318	-777732	-657206	-504607	-312271	-67563	233584	598803	1031962	1536328	2108136	2746842
169	21.13	0	0	0	0	0	0	0	0	0	0	0	0	0	0	0	0	0	0	0	0	-1216998	-1216514	-1217693	-1218963	-1218101	-1214595	-1207460	-1197485	-1184834	-1169734	-1151475	-1129030	-1100795	-1065804	-1020037	-961905	-885062	-785727	-659473	-499256	-301419	-59159	236531	598908	1037676	1556642	2154130	2818018
170	21.25	0	0	0	0	0	0	0	0	0	0	0	0	0	0	0	0	0	0	0	0	-1220580	-1219477	-1219144	-1218464	-1215758	-1210589	-1202684	-1192043	-1179165	-1164459	-1147470	-1126702	-1099722	-1064822	-1018163	-958625	-882114	-784397	-658914	-499256	-293967	-40069	273910	649210	1093601	1606899	2185312	2827465
171	21.38	0	0	0	0	0	0	0	0	0	0	0	0	0	0	0	0	0	0	0	0	-1205118	-1205012	-1206251	-1206992	-1205934	-1202140	-1195263	-1185347	-1172817	-1157612	-1139081	-1116409	-1087902	-1051823	-1005542	-946609	-869962	-772381	-647381	-486711	-284188	-31499	278792	652732	1092255	1600989	2175231	2809977
172	21.50	0	0	0	0	0	0	0	0	0	0	0	0	0	0	0	0	0	0	0	0	-1214428	-1213627	-1213385	-1211602	-1208413	-1203228	-1196563	-1187660	-1176490	-1162237	-1144885	-1122817	-1095203	-1058957	-1012691	-951491	-872788	-772638	-646611	-487089	-287997	-38391	269678	644479	1088492	1605509	2193399	2838937
173	21.63	0	0	0	0	0	0	0	0	0	0	0	0	0	0	0	0	0	0	0	0	-1205314	-1206130	-1208095	-1209138	-1207899	-1203107	-1194779	-1182899	-1168389	-1152050	-1133685	-1112600	-1085892	-1051234	-1005285	-944478	-865760	-765428	-637935	-475556	-271809	-20435	291685	665051	1106584	1619701	2198447	2835249
174	21.75	0	0	0	0	0	0	0	0	0	0	0	0	0	0	0	0	0	0	0	0	-1198875	-1200462	-1203258	-1205163	-1204634	-1200644	-1193116	-1182324	-1168812	-1152654	-1133549	-1110695	-1082219	-1046835	-1002171	-945037	-871156	-776613	-654697	-497155	-297625	-47052	263178	640489	1091046	1613535	2203299	2852903
175	21.88	0	0	0	0	0	0	0	0	0	0	0	0	0	0	0	0	0	0	0	0	-1208397	-1206946	-1207067	-1206765	-1205329	-1201596	-1195112	-1185499	-1172893	-1157370	-1138748	-1115290	-1085650	-1047788	-1000100	-938886	-862934	-766531	-645099	-491926	-298789	-56121	248200	624619	1075266	1603090	2195817	2841718
176	22.00	0	0	0	0	0	0	0	0	0	0	0	0	0	0	0	0	0	0	0	0	-1198618	-1198981	-1199540	-1198437	-1195127	-1189670	-1182445	-1173422	-1162403	-1148634	-1131267	-1109184	-1079907	-1042649	-993858	-932371	-853683	-755513	-631949	-478625	-288178	-50589	243454	605589	1039580	1548224	2128874	2772915
177	22.13	0	0	0	0	0	0	0	0	0	0	0	0	0	0	0	0	0	0	0	0	-1208579	-1206644	-1205783	-1204437	-1201747	-1196336	-1188703	-1178788	-1166560	-1152004	-1134411	-1112570	-1084758	-1048967	-1002791	-942997	-866274	-768874	-645643	-488192	-289327	-38648	273865	653579	1101082	1619188	2192839	2822945
178	22.25	0	0	0	0	0	0	0	0	0	0	0	0	0	0	0	0	0	0	0	0	-1203349	-1202578	-1202563	-1201550	-1198875	-1193781	-1186330	-1176218	-1163733	-1148165	-1129664	-1107083	-1079166	-1043510	-997531	-938205	-862193	-766607	-645553	-492485	-296068	-47581	265189	647109	1101959	1631385	2228284	2886095
179	22.38	0	0	0	0	0	0	0	0	0	0	0	0	0	0	0	0	0	0	0	0	-1190713	-1191454	-1193358	-1194855	-1194552	-1191212	-1184516	-1174374	-1161270	-1145459	-1126415	-1103591	-1074632	-1037993	-991470	-931842	-855860	-757871	-633189	-472836	-273880	-25649	278686	650042	1091318	1607700	2189106	2828523
180	22.50	0	0	0	0	0	0	0	0	0	0	0	0	0	0	0	0	0	0	0	0	-1196275	-1199057	-1201807	-1202110	-1199102	-1193086	-1185332	-1175916	-1165094	-1151354	-1133987	-1111527	-1082310	-1045309	-997682	-936104	-857099	-755483	-627385	-467727	-269602	-25770	275724	644933	1086723	1607428	2196104	2848686
181	22.63	0	0	0	0	0	0	0	0	0	0	0	0	0	0	0	0	0	0	0	0	-1190275	-1191454	-1192905	-1193645	-1192346	-1188703	-1182838	-1174087	-1162373	-1146155	-1125976	-1101143	-1070369	-1032884	-985681	-925267	-848121	-748741	-621792	-461001	-259642	-13013	290219	658733	1099390	1617857	2210342	2867942
182	22.75	0	0	0	0	0	0	0	0	0	0	0	0	0	0	0	0	0	0	0	0	-1181418	-1181070	-1181161	-1180571	-1178183	-1174586	-1169749	-1162932	-1153349	-1140018	-1122833	-1100780	-1073014	-1037963	-991606	-930406	-850479	-748122	-619842	-459973	-264886	-23291	274514	640368	1083066	1603770	2191872	2842383
183	22.88	0	0	0	0	0	0	0	0	0	0	0	0	0	0	0	0	0	0	0	0	-1198150	-1196442	-1195958	-1195610	-1194598	-1192013	-1187055	-1178440	-1166469	-1150976	-1132053	-1108897	-1079801	-1042649	-995037	-933535	-855527	-754394	-625420	-461197	-254714	2131	316609	700903	1156267	1685904	2276712	2923731
184	23.00	0	0	0	0	0	0	0	0	0	0	0	0	0	0	0	0	0	0	0	0	-1204936	-1201974	-1199948	-1198316	-1196079	-1192210	-1186526	-1177442	-1165335	-1149525	-1130299	-1107174	-1078622	-1043026	-997470	-938054	-862526	-765579	-641411	-482101	-279125	-21432	295494	682236	1135348	1660844	2254704	2909946
185	23.13	0	0	0	0	0	0	0	0	0	0	0	0	0	0	0	0	0	0	0	0	-1196351	-1196940	-1198059	-1198361	-1196275	-1192134	-1185695	-1177080	-1165940	-1151037	-1132476	-1108338	-1077277	-1038039	-987585	-924073	-843708	-742847	-615928	-453670	-249862	7663	322731	703624	1152624	1669822	2254992	2896509
186	23.25	0	0	0	0	0	0	0	0	0	0	0	0	0	0	0	0	0	0	0	0	-1172334	-1173256	-1174828	-1175296	-1173694	-1170097	-1164580	-1156100	-1144915	-1130738	-1112615	-1089792	-1060922	-1023498	-974677	-911785	-832492	-732251	-605982	-446355	-244240	12016	325769	707871	1152322	1668885	2247872	2891173
187	23.38	0	0	0	0	0	0	0	0	0	0	0	0	0	0	0	0	0	0	0	0	-1186904	-1186572	-1187101	-1186285	-1184365	-1180390	-1174994	-1168071	-1158851	-1146366	-1129151	-1106584	-1077428	-1039595	-991938	-930013	-851099	-749119	-618996	-455272	-251162	2373	310080	687149	1136557	1665167	2263849	2926935
188	23.50	0	0	0	0	0	0	0	0	0	0	0	0	0	0	0	0	0	0	0	0	-1169794	-1169235	-1169311	-1168086	-1164867	-1160075	-1154407	-1147727	-1140033	-1129544	-1114172	-1091333	-1059728	-1018268	-965986	-902111	-823862	-727218	-606904	-452401	-257994	-8751	303217	686514	1145187	1677591	2275019	2925272
189	23.63	0	0	0	0	0	0	0	0	0	0	0	0	0	0	0	0	0	0	0	0	-1171245	-1176399	-1182355	-1186980	-1187463	-1183322	-1174843	-1162917	-1148739	-1132914	-1114323	-1091847	-1063099	-1026551	-978244	-916818	-836770	-734564	-605604	-444284	-247399	-15	306256	682780	1136466	1668144	2268021	2926648
190	23.75	0	0	0	0	0	0	0	0	0	0	0	0	0	0	0	0	0	0	0	0	-1153183	-1154317	-1156448	-1157823	-1157476	-1154634	-1148951	-1140124	-1128334	-1112796	-1094160	-1072032	-1044493	-1009018	-962858	-901174	-820703	-717605	-586953	-421279	-217275	35867	343287	716743	1157687	1681219	2276591	2939299
191	23.88	0	0	0	0	0	0	0	0	0	0	0	0	0	0	0	0	0	0	0	0	-1152548	-1151218	-1151248	-1151415	-1151128	-1148966	-1144205	-1136360	-1124813	-1109653	-1090835	-1067996	-1039928	-1003758	-956630	-895022	-815519	-714083	-586439	-423924	-222565	27146	334913	707342	1147424	1662023	2246376	2889995
192	24.00	0	0	0	0	0	0	0	0	0	0	0	0	0	0	0	0	0	0	0	0	-1153939	-1155163	-1158005	-1160620	-1161723	-1160665	-1157294	-1151052	-1141938	-1129680	-1113371	-1091212	-1061980	-1023271	-973015	-909638	-829228	-729530	-603624	-443377	-241610	14963	333810	722064	1184199	1717056	2310690	2956757
193	24.13	0	0	0	0	0	0	0	0	0	0	0	0	0	0	0	0	0	0	0	0	-1155269	-1155964	-1158247	-1160000	-1159879	-1157068	-1151460	-1143132	-1132567	-1118812	-1102080	-1080572	-1052806	-1016530	-968254	-904288	-820038	-711559	-574528	-403958	-194557	59869	371627	748847	1196170	1718930	2310508	2960445
194	24.25	0	0	0	0	0	0	0	0	0	0	0	0	0	0	0	0	0	0	0	0	-1157597	-1157778	-1158231	-1157309	-1154952	-1151400	-1147001	-1140623	-1131448	-1118646	-1100992	-1078244	-1049103	-1011966	-964384	-903849	-826023	-726870	-600631	-439886	-237967	12424	321053	696127	1141787	1665046	2264771	2931696
195	24.38	0	0	0	0	0	0	0	0	0	0	0	0	0	0	0	0	0	0	0	0	-1152095	-1153697	-1156675	-1159970	-1161375	-1159849	-1154891	-1146895	-1136285	-1122712	-1106720	-1085998	-1057476	-1020294	-970959	-906963	-824618	-720280	-588086	-420841	-211743	47203	364493	748212	1203032	1733788	2333966	2992760
196	24.50	0	0	0	0	0	0	0	0	0	0	0	0	0	0	0	0	0	0	0	0	-1138582	-1140094	-1143056	-1145323	-1145988	-1144855	-1141998	-1137358	-1129302	-1117603	-1100780	-1077216	-1046639	-1007990	-958746	-897093	-817619	-716637	-586983	-422322	-215506	39767	353520	732871	1184954	1708954	2303389	2960097
197	24.63	0	0	0	0	0	0	0	0	0	0	0	0	0	0	0	0	0	0	0	0	-1143298	-1145807	-1149102	-1151052	-1151415	-1150145	-1147485	-1142709	-1134411	-1122001	-1104000	-1080541	-1050372	-1012479	-964339	-903154	-824164	-723439	-594676	-431361	-227130	27221	339221	720310	1176203	1710753	2315995	2983344
198	24.75	0	0	0	0	0	0	0	0	0	0	0	0	0	0	0	0	0	0	0	0	-1129967	-1130360	-1132340	-1134320	-1135741	-1135242	-1132975	-1127896	-1119961	-1108338	-1092119	-1070399	-1040865	-1002035	-950781	-885243	-802444	-697956	-566971	-401328	-195132	62318	377733	758536	1208443	1733274	2326983	2982663
199	24.88	0	0	0	0	0	0	0	0	0	0	0	0	0	0	0	0	0	0	0	0	-1135741	-1137811	-1140577	-1142588	-1142331	-1139822	-1135710	-1129740	-1121623	-1110862	-1095762	-1075478	-1047531	-1010787	-962011	-898045	-816153	-711801	-578549	-410245	-198895	63875	387286	776477	1237448	1770834	2367340	3023881
200	25.00	0	0	0	0	0	0	0	0	0	0	0	0	0	0	0	0	0	0	0	0	-1110302	-1111587	-1114459	-1116877	-1117618	-1116333	-1112796	-1106902	-1098951	-1088809	-1075100	-1055753	-1028728	-991047	-940760	-875902	-792816	-689506	-559791	-396627	-192426	62741	376509	760622	1214731	1745819	2347434	3001239
201	25.13	0	0	0	0	0	0	0	0	0	0	0	0	0	0	0	0	0	0	0	0	-1133851	-1134380	-1135937	-1137358	-1137887	-1137101	-1134940	-1130435	-1123316	-1112751	-1098543	-1078788	-1051899	-1015397	-965699	-900857	-816788	-710365	-576795	-409202	-199454	60565	378731	764914	1224737	1762007	2364801	3032104
202	25.25	0	0	0	0	0	0	0	0	0	0	0	0	0	0	0	0	0	0	0	0	-1121079	-1120928	-1122198	-1123271	-1123059	-1121110	-1116968	-1110983	-1102866	-1092104	-1077715	-1057355	-1029710	-991666	-940805	-874980	-791350	-685048	-552037	-385956	-178143	76647	389024	765609	1215290	1741859	2343338	3014329
203	25.38	0	0	0	0	0	0	0	0	0	0	0	0	0	0	0	0	0	0	0	0	-1112766	-1111738	-1112796	-1114157	-1115033	-1113960	-1111013	-1105511	-1098211	-1088069	-1074556	-1055451	-1029242	-993480	-946246	-884563	-804953	-702399	-571732	-405545	-196764	63875	384006	771534	1226792	1755417	2349640	3001753
204	25.50	0	0	0	0	0	0	0	0	0	0	0	0	0	0	0	0	0	0	0	0	-1103728	-1103410	-1104272	-1105602	-1107023	-1107763	-1107461	-1105299	-1100055	-1090819	-1076808	-1056872	-1029166	-991681	-942226	-878472	-797789	-696656	-568618	-406406	-200165	61184	384051	779107	1243358	1778271	2377180	3036487
205	25.63	0	0	0	0	0	0	0	0	0	0	0	0	0	0	0	0	0	0	0	0	-1098830	-1098498	-1099828	-1101324	-1102911	-1102821	-1100735	-1095641	-1087933	-1076732	-1061028	-1039958	-1011467	-973529	-925222	-863342	-785440	-686514	-560864	-402582	-200528	53793	372670	767982	1240713	1793960	2411566	3085973
206	25.75	0	0	0	0	0	0	0	0	0	0	0	0	0	0	0	0	0	0	0	0	-1117830	-1116061	-1115910	-1115955	-1115683	-1114489	-1112056	-1107325	-1099707	-1088295	-1072591	-1051294	-1023664	-987752	-941485	-882039	-805603	-706465	-579032	-413903	-203112	59204	384611	776220	1242451	1788216	2406215	3087711
207	25.88	0	0	0	0	0	0	0	0	0	0	0	0	0	0	0	0	0	0	0	0	-1073800	-1076188	-1080239	-1084199	-1086557	-1086451	-1083776	-1077791	-1068676	-1056191	-1039762	-1018646	-991183	-955859	-909835	-850086	-772653	-672517	-543422	-380333	-174409	80758	395660	780301	1242240	1781415	2389407	3055305
208	26.00	0	0	0	0	0	0	0	0	0	0	0	0	0	0	0	0	0	0	0	0	-1078879	-1079015	-1081615	-1084849	-1087630	-1089157	-1088764	-1085439	-1079483	-1070173	-1056705	-1037993	-1012147	-976960	-929424	-865216	-781782	-672744	-535653	-363178	-150649	107919	422685	803653	1259667	1797421	2411792	3090674
209	26.13	0	0	0	0	0	0	0	0	0	0	0	0	0	0	0	0	0	0	0	0	-1078652	-1081887	-1086875	-1091137	-1093812	-1093842	-1091621	-1086935	-1080269	-1071064	-1058504	-1040593	-1015034	-978879	-930285	-866123	-782538	-678095	-545069	-376675	-165673	96689	421158	811982	1277109	1815302	2426212	3098790
210	26.25	0	0	0	0	0	0	0	0	0	0	0	0	0	0	0	0	0	0	0	0	-1072002	-1073211	-1076385	-1079393	-1081282	-1081237	-1079695	-1075826	-1069629	-1060333	-1046352	-1026249	-998513	-961724	-913447	-850449	-770310	-668074	-537270	-372065	-162423	101284	428444	826794	1298497	1842509	2451983	3114510
211	26.38	0	0	0	0	0	0	0	0	0	0	0	0	0	0	0	0	0	0	0	0	-1067119	-1067014	-1068495	-1070354	-1071291	-1070853	-1068374	-1063144	-1055602	-1045158	-1030995	-1012434	-987268	-953728	-907507	-846821	-766350	-662829	-530998	-363178	-151646	112877	435653	826507	1283715	1809226	2399323	3053265
212	26.50	0	0	0	0	0	0	0	0	0	0	0	0	0	0	0	0	0	0	0	0	-1070278	-1070944	-1072636	-1073815	-1073528	-1071488	-1068208	-1062887	-1055995	-1046941	-1034577	-1017407	-993299	-960333	-915790	-856510	-778729	-675948	-543346	-373108	-160836	103687	427098	816108	1275537	1808047	2409238	3072385
213	26.63	0	0	0	0	0	0	0	0	0	0	0	0	0	0	0	0	0	0	0	0	-1059743	-1056902	-1055421	-1054997	-1054423	-1053667	-1051340	-1047274	-1041137	-1032522	-1020702	-1004665	-982038	-950433	-905421	-845038	-763901	-658793	-524544	-353187	-140733	125090	449166	844358	1310725	1854449	2471027	3147052
214	26.75	0	0	0	0	0	0	0	0	0	0	0	0	0	0	0	0	0	0	0	0	-1065291	-1066485	-1068344	-1069885	-1070233	-1069009	-1066878	-1063235	-1058111	-1050508	-1038991	-1022758	-998241	-964309	-917755	-855255	-774316	-668935	-536484	-368634	-161758	93515	404713	785092	1243146	1786191	2409661	3101058
215	26.88	0	0	0	0	0	0	0	0	0	0	0	0	0	0	0	0	0	0	0	0	-1057884	-1060303	-1064248	-1067558	-1068918	-1068147	-1064988	-1059789	-1053259	-1044901	-1032990	-1016167	-991848	-957416	-910832	-850267	-771912	-672140	-544389	-380499	-175029	83615	403323	789869	1248482	1783863	2389513	3060157
216	27.00	0	0	0	0	0	0	0	0	0	0	0	0	0	0	0	0	0	0	0	0	-1042981	-1044750	-1047803	-1051098	-1052670	-1052503	-1050750	-1047017	-1041182	-1032250	-1019750	-1001687	-976098	-941757	-895174	-833339	-752475	-648122	-513661	-344723	-134703	123714	443694	830422	1294219	1832820	2440027	3105819
217	27.13	0	0	0	0	0	0	0	0	0	0	0	0	0	0	0	0	0	0	0	0	-1057552	-1056131	-1055632	-1055330	-1054559	-1052896	-1050387	-1046609	-1040941	-1032053	-1019417	-1001914	-977383	-945052	-901114	-842529	-765428	-664658	-534020	-366987	-154594	110942	440233	837647	1311314	1858530	2474912	3148382
218	27.25	0	0	0	0	0	0	0	0	0	0	0	0	0	0	0	0	0	0	0	0	-1053682	-1053380	-1054347	-1055829	-1056962	-1057098	-1056358	-1054000	-1048574	-1039444	-1025705	-1006101	-979559	-945476	-900101	-840790	-762586	-662436	-532101	-368529	-162695	94769	412724	799980	1269083	1817252	2439014	3121886
219	27.38	0	0	0	0	0	0	0	0	0	0	0	0	0	0	0	0	0	0	0	0	-1057386	-1055980	-1055919	-1055980	-1055300	-1053425	-1050221	-1045173	-1037948	-1028123	-1014989	-996805	-971760	-937888	-892045	-831404	-751870	-652203	-523878	-362936	-157768	99818	423864	823635	1300099	1850943	2467052	3134718
220	27.50	0	0	0	0	0	0	0	0	0	0	0	0	0	0	0	0	0	0	0	0	-1035288	-1038689	-1042815	-1045762	-1046609	-1044689	-1040850	-1034456	-1025901	-1015170	-1001567	-984668	-961104	-928623	-884094	-823121	-742907	-640338	-510048	-346174	-141625	113043	429139	819418	1287947	1840529	2467309	3154715
221	27.63	0	0	0	0	0	0	0	0	0	0	0	0	0	0	0	0	0	0	0	0	-1055783	-1055405	-1055919	-1056539	-1056448	-1055466	-1053305	-1050040	-1044432	-1036210	-1024178	-1007083	-982945	-949405	-904031	-844070	-765534	-664975	-535154	-368740	-157088	107466	434097	830135	1296743	1836478	2444032	3110414
222	27.75	0	0	0	0	0	0	0	0	0	0	0	0	0	0	0	0	0	0	0	0	-1024450	-1028380	-1033519	-1037706	-1039565	-1038205	-1034003	-1027262	-1018329	-1007628	-994644	-977731	-954680	-922335	-878154	-818390	-739461	-637134	-506451	-342032	-137000	116353	431965	823786	1299918	1856989	2483346	3160398
223	27.88	0	0	0	0	0	0	0	0	0	0	0	0	0	0	0	0	0	0	0	0	-1037479	-1038492	-1041424	-1045203	-1047712	-1048256	-1046367	-1041379	-1034124	-1023513	-1009305	-990200	-964460	-930648	-886165	-826794	-748953	-647502	-517092	-350874	-142411	120842	445357	838674	1309032	1853013	2466236	3144573
224	28.00	0	0	0	0	0	0	0	0	0	0	0	0	0	0	0	0	0	0	0	0	-1041500	-1045445	-1050040	-1053395	-1054242	-1052413	-1049284	-1044659	-1037494	-1027035	-1012086	-991787	-964717	-929786	-884487	-825328	-748318	-649089	-519964	-354955	-147233	111516	429698	815866	1276202	1818431	2441145	3132451
225	28.13	0	0	0	0	0	0	0	0	0	0	0	0	0	0	0	0	0	0	0	0	-1038190	-1038628	-1040442	-1042452	-1043389	-1042346	-1038945	-1032854	-1024465	-1012661	-998347	-979544	-955164	-922063	-877429	-817619	-739098	-638570	-509912	-345524	-138285	124032	451055	849723	1321668	1867282	2477890	3145858
226	28.25	0	0	0	0	0	0	0	0	0	0	0	0	0	0	0	0	0	0	0	0	-1027095	-1027398	-1028955	-1030723	-1031645	-1031373	-1029589	-1024224	-1015774	-1003637	-987646	-967936	-941818	-907477	-859956	-797124	-714597	-609489	-475315	-307314	-95782	166398	487361	881298	1354588	1910253	2540283	3228324
227	28.38	0	0	0	0	0	0	0	0	0	0	0	0	0	0	0	0	0	0	0	0	-1035650	-1035923	-1037238	-1038794	-1038915	-1037630	-1034275	-1029136	-1021307	-1010802	-995989	-976174	-948287	-911467	-862934	-799784	-719524	-617500	-489024	-325920	-121810	136350	457449	852474	1323875	1877923	2500214	3184295
228	28.50	0	0	0	0	0	0	0	0	0	0	0	0	0	0	0	0	0	0	0	0	-1049027	-1046049	-1044009	-1042966	-1042135	-1040412	-1037827	-1033111	-1025493	-1015125	-1001158	-983278	-958837	-926265	-880799	-819418	-738085	-633400	-500269	-332389	-120525	146024	478035	883716	1369718	1935072	2568125	3257360
229	28.63	0	0	0	0	0	0	0	0	0	0	0	0	0	0	0	0	0	0	0	0	-1042074	-1043147	-1045415	-1047349	-1047546	-1045702	-1041696	-1034638	-1025297	-1012661	-996821	-976703	-950977	-916924	-872018	-812208	-734700	-634111	-506028	-341609	-134612	125452	448909	845567	1323497	1888503	2530806	3235579
230	28.75	0	0	0	0	0	0	0	0	0	0	0	0	0	0	0	0	0	0	0	0	-1015457	-1016152	-1018268	-1020369	-1021125	-1020747	-1018813	-1014807	-1008126	-997818	-983368	-963145	-935711	-899904	-852459	-791788	-713751	-614900	-487391	-325980	-120570	135232	454048	842801	1314518	1861160	2479975	3155184
231	28.88	0	0	0	0	0	0	0	0	0	0	0	0	0	0	0	0	0	0	0	0	-1034668	-1035469	-1037661	-1038976	-1038628	-1036074	-1031630	-1025780	-1017739	-1007204	-992619	-972380	-944977	-908505	-860530	-798333	-717816	-615323	-484716	-318060	-107980	153007	474907	865866	1330102	1873131	2492188	3175967
232	29.00	0	0	0	0	0	0	0	0	0	0	0	0	0	0	0	0	0	0	0	0	-1036512	-1036240	-1036965	-1037328	-1036769	-1034728	-1030783	-1025342	-1017437	-1007235	-993072	-973876	-946821	-910243	-862027	-800268	-721232	-620356	-491291	-324968	-116837	147580	471536	867634	1340818	1896831	2533557	3236909
233	29.13	0	0	0	0	0	0	0	0	0	0	0	0	0	0	0	0	0	0	0	0	-1017301	-1018903	-1022576	-1026264	-1028486	-1028365	-1025146	-1018949	-1010122	-998166	-983338	-964686	-939732	-906540	-861377	-801250	-721353	-619253	-486893	-317350	-102206	167018	499831	903759	1382444	1942040	2574156	3266701
234	29.25	0	0	0	0	0	0	0	0	0	0	0	0	0	0	0	0	0	0	0	0	-1011663	-1014414	-1018495	-1021866	-1023438	-1022909	-1020430	-1016062	-1008701	-997999	-982613	-961119	-932416	-894463	-845431	-781737	-701220	-598364	-467984	-301872	-91958	173396	503836	910243	1395640	1963472	2599367	3288164
235	29.38	0	0	0	0	0	0	0	0	0	0	0	0	0	0	0	0	0	0	0	0	-1004590	-1006403	-1009698	-1013432	-1016092	-1017059	-1014898	-1008731	-998680	-985409	-969387	-951174	-926612	-894554	-849013	-788176	-709156	-607237	-473365	-299817	-78642	198321	534761	933716	1401761	1938473	2544772	3216187
236	29.50	0	0	0	0	0	0	0	0	0	0	0	0	0	0	0	0	0	0	0	0	-1012736	-1010515	-1009653	-1009336	-1008489	-1006751	-1002640	-996276	-987948	-977549	-965019	-948106	-924799	-891183	-843315	-779303	-695960	-587708	-451887	-278671	-62711	207949	537845	939445	1417072	1968914	2585401	3260761
237	29.63	0	0	0	0	0	0	0	0	0	0	0	0	0	0	0	0	0	0	0	0	-1004590	-1006509	-1009683	-1011966	-1012555	-1010892	-1006827	-1000206	-991379	-978864	-962752	-942075	-914203	-878623	-831072	-770401	-690444	-587149	-452884	-278611	-58932	214569	549196	954272	1433245	1992810	2619712	3300966
238	29.75	0	0	0	0	0	0	0	0	0	0	0	0	0	0	0	0	0	0	0	0	-1002851	-1003486	-1006237	-1008897	-1010515	-1010847	-1008776	-1003683	-995233	-982764	-965548	-943042	-914203	-876522	-827278	-764748	-684156	-581330	-450526	-281467	-64162	207737	542938	949481	1427940	1979071	2598581	3273623
239	29.88	0	0	0	0	0	0	0	0	0	0	0	0	0	0	0	0	0	0	0	0	-1004831	-1006902	-1010182	-1012888	-1013598	-1011346	-1006313	-998528	-989036	-977761	-964354	-946896	-922501	-887404	-839143	-773832	-689189	-581345	-446748	-276328	-64147	200694	529985	930331	1406734	1960117	2590177	3282828
240	30.00	0	0	0	0	0	0	0	0	0	0	0	0	0	0	0	0	0	0	0	0	-977912	-979121	-982703	-987147	-990548	-991440	-988976	-982356	-972138	-959290	-943601	-923559	-897410	-861800	-812843	-747986	-662753	-554501	-418695	-250165	-41898	217910	540051	936286	1415516	1978376	2614588	3312498
241	30.13	0	0	0	0	0	0	0	0	0	0	0	0	0	0	0	0	0	0	0	0	-1010651	-1010469	-1011044	-1010892	-1009336	-1006161	-1001143	-994659	-986527	-975796	-961845	-942891	-916032	-879137	-828835	-762753	-677188	-569450	-431618	-255969	-37696	236486	572170	976068	1457021	2019609	2659494	3366186
242	30.25	0	0	0	0	0	0	0	0	0	0	0	0	0	0	0	0	0	0	0	0	-1006207	-1005376	-1006222	-1007220	-1007340	-1005723	-1001491	-994871	-985696	-973166	-957749	-937888	-912087	-877746	-832205	-770869	-690504	-585501	-449106	-272686	-51979	223578	558476	963538	1438384	1990210	2615071	3302493
243	30.38	0	0	0	0	0	0	0	0	0	0	0	0	0	0	0	0	0	0	0	0	-977383	-978668	-982023	-985666	-988281	-989429	-988840	-986074	-980572	-971292	-957069	-936119	-907371	-869433	-819539	-755543	-673802	-569737	-436636	-268151	-53173	216625	553534	962586	1452774	2017795	2646661	3327840
244	30.50	0	0	0	0	0	0	0	0	0	0	0	0	0	0	0	0	0	0	0	0	-983686	-985212	-988689	-991440	-993012	-992377	-989505	-983656	-974980	-963175	-947652	-927383	-900645	-865110	-818496	-756616	-676477	-572488	-437875	-266141	-49924	220570	553957	958399	1438415	1999778	2634040	3331347
245	30.63	0	0	0	0	0	0	0	0	0	0	0	0	0	0	0	0	0	0	0	0	-975494	-975191	-976234	-977322	-977549	-976098	-972471	-966727	-957628	-945657	-930270	-910606	-884321	-849300	-802036	-739461	-656813	-551720	-415808	-240854	-21493	253384	588313	990911	1467465	2029343	2662139	3360125
246	30.75	0	0	0	0	0	0	0	0	0	0	0	0	0	0	0	0	0	0	0	0	-977474	-980013	-984169	-987767	-990170	-990487	-989837	-985998	-978532	-966969	-950539	-928426	-900237	-863901	-816728	-754440	-673016	-568618	-436061	-267244	-56060	212181	546339	954968	1442118	2005416	2639316	3333569
247	30.88	0	0	0	0	0	0	0	0	0	0	0	0	0	0	0	0	0	0	0	0	-961875	-962601	-964188	-965941	-967014	-966787	-964686	-959956	-951325	-939112	-922758	-902444	-874980	-839324	-791546	-728336	-646066	-540837	-405061	-231029	-14812	255621	590006	996458	1483547	2048433	2683269	3370479
248	31.00	0	0	0	0	0	0	0	0	0	0	0	0	0	0	0	0	0	0	0	0	-976219	-977655	-980149	-981827	-982159	-980799	-978305	-973831	-966727	-956449	-941243	-919796	-890337	-851507	-801568	-738282	-660320	-560879	-432993	-268091	-53370	218892	559988	974677	1471199	2051637	2710627	3433885
249	31.13	0	0	0	0	0	0	0	0	0	0	0	0	0	0	0	0	0	0	0	0	-946927	-946564	-947214	-947788	-947471	-946579	-945067	-941924	-936512	-927368	-913765	-893556	-866410	-830089	-781933	-719026	-637330	-530801	-392833	-215476	10580	289115	630604	1040517	1518810	2073493	2698807	3390869
250	31.25	0	0	0	0	0	0	0	0	0	0	0	0	0	0	0	0	0	0	0	0	-929650	-931268	-934275	-937253	-938810	-938115	-934925	-929046	-920612	-910409	-896156	-877504	-850721	-814355	-765972	-702188	-620054	-513752	-378852	-205999	9703	282283	619359	1030920	1519883	2086552	2723142	3419149
251	31.38	0	0	0	0	0	0	0	0	0	0	0	0	0	0	0	0	0	0	0	0	-952411	-952955	-954541	-956249	-957200	-957019	-955871	-952985	-947546	-937574	-922736	-901886	-873042	-835677	-785907	-720952	-636386	-527947	-390302	-215095	3928	277904	619056	1031961	1524311	2092177	2731222	3427396
252	31.50	0	0	0	0	0	0	0	0	0	0	0	0	0	0	0	0	0	0	0	0	-945370	-949283	-954768	-958923	-960630	-959270	-955795	-949888	-942121	-931908	-917886	-898697	-871410	-834272	-784184	-717976	-632896	-526058	-389093	-215321	4139	281152	623709	1036705	1523812	2086194	2718168	3410912
253	31.63	0	0	0	0	0	0	0	0	0	0	0	0	0	0	0	0	0	0	0	0	-944740	-944800	-945795	-946730	-946308	-945584	-943519	-940684	-935664	-927371	-914646	-895830	-868707	-831813	-781607	-716610	-632163	-524227	-385473	-207323	17097	294906	633807	1044686	1528899	2098418	2743066	3446619
254	31.75	0	0	0	0	0	0	0	0	0	0	0	0	0	0	0	0	0	0	0	0	-919542	-922027	-926138	-929917	-932040	-931845	-929526	-924647	-917690	-908399	-895344	-877696	-852113	-816305	-767322	-702633	-618594	-512060	-375695	-202694	16970	288133	624015	1029254	1505763	2063132	2694466	3393997
255	31.88	0	0	0	0	0	0	0	0	0	0	0	0	0	0	0	0	0	0	0	0	-919271	-919136	-921166	-924054	-925724	-926265	-924280	-919662	-912594	-901750	-887357	-867760	-841620	-806938	-760149	-698936	-618593	-515238	-383052	-212093	5083	278554	619615	1032252	1514808	2076084	2703310	3391133
256	32.00	0	0	0	0	0	0	0	0	0	0	0	0	0	0	0	0	0	0	0	0	-917694	-919242	-922475	-925392	-926369	-925346	-921979	-916431	-908928	-898750	-885008	-866215	-840355	-805459	-758475	-696532	-615705	-511032	-378666	-208337	7622	280128	619509	1032439	1526062	2100046	2747474	3457132
257	32.13	0	0	0	0	0	0	0	0	0	0	0	0	0	0	0	0	0	0	0	0	-913375	-913869	-915873	-918745	-920585	-920899	-918730	-914676	-908035	-898716	-886122	-869205	-844854	-810795	-763080	-698822	-612800	-502727	-362244	-185161	33639	300798	625305	1020263	1490666	2044744	2680385	3380045
258	32.25	0	0	0	0	0	0	0	0	0	0	0	0	0	0	0	0	0	0	0	0	-914527	-914093	-914931	-916307	-916890	-915469	-911789	-906315	-897969	-887005	-873169	-855115	-830390	-797647	-753148	-692301	-611619	-505015	-367121	-192355	28494	303042	643449	1054486	1539458	2101328	2727397	3412219
259	32.38	0	0	0	0	0	0	0	0	0	0	0	0	0	0	0	0	0	0	0	0	-930651	-933702	-938010	-942527	-945325	-945728	-944098	-940568	-934091	-924429	-910309	-889667	-860859	-823375	-775151	-713271	-633233	-531835	-399130	-230452	-15346	256509	597155	1012081	1506357	2079730	2724016	3426324
260	32.50	0	0	0	0	0	0	0	0	0	0	0	0	0	0	0	0	0	0	0	0	-918856	-915802	-913448	-910662	-908263	-905269	-901961	-898088	-892873	-886199	-875666	-860112	-836335	-802442	-755990	-693805	-612670	-507668	-373302	-203523	7285	269953	593809	996579	1481513	2047403	2685012	3376062
261	32.63	0	0	0	0	0	0	0	0	0	0	0	0	0	0	0	0	0	0	0	0	-934290	-936421	-940071	-943527	-945732	-945643	-943169	-938402	-931221	-921508	-908457	-891071	-866250	-832238	-786665	-725582	-645803	-542604	-407061	-232783	-10339	267942	606338	1009615	1480276	2020869	2633167	3309422
262	32.75	0	0	0	0	0	0	0	0	0	0	0	0	0	0	0	0	0	0	0	0	-943172	-942622	-943365	-944689	-945165	-944228	-941640	-937431	-930947	-922722	-910378	-892991	-867544	-832102	-784554	-721582	-640556	-537219	-408168	-245177	-40810	214361	536044	930367	1402890	1958701	2584473	3271715
263	32.88	0	0	0	0	0	0	0	0	0	0	0	0	0	0	0	0	0	0	0	0	-916981	-916862	-918915	-921369	-922752	-922365	-920253	-915702	-909113	-899595	-887087	-868169	-842439	-806922	-759047	-695659	-614022	-509809	-377634	-210271	2632	270179	604712	1012554	1497317	2060520	2695290	3396691
264	33.00	0	0	0	0	0	0	0	0	0	0	0	0	0	0	0	0	0	0	0	0	-902436	-898464	-895668	-893661	-892218	-890552	-888232	-885272	-879888	-871158	-856895	-836564	-808544	-770960	-722237	-658834	-576974	-471764	-335678	-162916	55430	326695	663118	1069739	1554563	2113586	2740816	3424548
265	33.13	0	0	0	0	0	0	0	0	0	0	0	0	0	0	0	0	0	0	0	0	-870370	-873300	-877762	-881212	-882476	-881063	-877553	-872140	-864436	-854753	-841234	-822896	-797523	-762735	-714979	-649925	-564332	-452920	-310127	-130910	93356	370704	708955	1118864	1602721	2165656	2800634	3499164
266	33.25	0	0	0	0	0	0	0	0	0	0	0	0	0	0	0	0	0	0	0	0	-856166	-854263	-854233	-855155	-855988	-855616	-853668	-849845	-843762	-834184	-820561	-801226	-773920	-736782	-686854	-619689	-531434	-417464	-270372	-83510	153516	448682	811533	1246309	1757933	2339831	2982499	3676820
267	33.38	0	0	0	0	0	0	0	0	0	0	0	0	0	0	0	0	0	0	0	0	-831730	-832266	-834363	-836802	-838111	-838274	-837144	-834393	-829470	-819743	-805584	-784167	-754422	-714711	-660247	-587876	-492170	-370867	-217350	-25328	214926	510924	872050	1304596	1812010	2396779	3048846	3757044
268	33.50	0	0	0	0	0	0	0	0	0	0	0	0	0	0	0	0	0	0	0	0	-825945	-827521	-829886	-831715	-832028	-830243	-826123	-819579	-810165	-797002	-779676	-756593	-725762	-685114	-630665	-559514	-465131	-344081	-189018	7942	250338	551497	918721	1363879	1886880	2492753	3166728	3896997
[truncated: 208 more columns]
